# Supplementary material for: Major depressive disorder and cardiometabolic diseases: a bidirectional Mendelian randomisation study
Source: Springer Nature journal article supplement (doi:10.1007/s00125-020-05131-6), 2020-04-08
Supplement: MOESM1 [file 17878760]

**ESM Table 1. Details of studies and datasets used for analyses**

| <b>Exposure/Outcome</b>   | <b>Consortium or cohort study</b>                                                | <b>Participants</b>                                                                                                                                                                              | <b>Web source if publicly available</b>                                                                       |
|---------------------------|----------------------------------------------------------------------------------|--------------------------------------------------------------------------------------------------------------------------------------------------------------------------------------------------|---------------------------------------------------------------------------------------------------------------|
| Major depressive disorder | UK Biobank, 23andMe and Psychiatric Genomics Consortium.                         | 807,553 individuals (246,363 MDD cases and 561,190 controls) in the discovery stage and 1,306,354 individuals (414,055 cases and 892,299 controls) in the replication stage of European ancestry | <a href="https://datashare.is.ed.ac.uk/handle/10283/3203">https://datashare.is.ed.ac.uk/handle/10283/3203</a> |
| Type 2 diabetes           | DIAGRAM consortium                                                               | 89,8130 individuals (74,124 type 2 diabetes cases and 824,006 controls) of European ancestry                                                                                                     | <a href="http://diagram-consortium.org/downloads.html">http://diagram-consortium.org/downloads.html</a>       |
| Coronary artery disease   | CARDIoGRAMplusC4D consortium                                                     | 184,305 individuals (60,801 coronary artery disease cases and 123,504 non-cases) of mainly European (77%) and Asian (19%) ancestry                                                               | <a href="http://www.cardiogramplusc4d.org/">www.cardiogramplusc4d.org/</a>                                    |
| Heart failure             | Heart Failure Molecular Epidemiology for Therapeutic Targets (HERMES) Consortium | 977,323 individuals (47,309 heart failure cases and 930,014 non-cases) of European ancestry                                                                                                      | <a href="http://www.kp4cd.org/datasets/m">http://www.kp4cd.org/datasets/m</a><br>i                            |

**ESM Table 2. Characteristics of the single-nucleotide polymorphisms associated with major depressive disorder and their associations with type 2 diabetes**

| Chr | SNP         | Major depressive disorder |      |      |            |       |          | Type 2 diabetes |     |      |                   |       |       | Proxy <sup>#</sup> | R <sup>2</sup> | Ambiguous<br>palindrome* |
|-----|-------------|---------------------------|------|------|------------|-------|----------|-----------------|-----|------|-------------------|-------|-------|--------------------|----------------|--------------------------|
|     |             | EA                        | NEA  | EAF  | Beta       | SE    | P        | EA              | NEA | EAF  | Beta <sup>a</sup> | SE    | P     |                    |                |                          |
| 1   | rs1002656   | T                         | C    | 0.70 | -<br>0.021 | 0.002 | 4.84E-19 | T               | C   | 0.71 | -<br>0.005        | 0.007 | 0.490 |                    |                |                          |
| 5   | rs10061069  | C                         | G    | 0.22 | -<br>0.025 | 0.003 | 5.17E-22 | C               | G   | 0.21 | -<br>0.007        | 0.008 | 0.370 |                    |                |                          |
| 14  | rs10149470  | A                         | G    | 0.49 | -<br>0.021 | 0.002 | 6.88E-22 | A               | G   | 0.49 | -<br>0.008        | 0.006 | 0.230 |                    |                |                          |
| 3   | rs4346585   | T(C)                      | C(T) | 0.70 | -<br>0.016 | 0.002 | 4.87E-12 | C               | T   | 0.68 | 0.009             | 0.007 | 0.200 | rs10212298         | 1.0            |                          |
| 10  | rs1021363   | A                         | G    | 0.35 | 0.023      | 0.002 | 3.77E-23 | A               | G   | 0.35 | 0.006             | 0.007 | 0.350 |                    |                |                          |
| 14  | rs1045430   | T                         | G    | 0.48 | -<br>0.023 | 0.002 | 4.44E-25 | T               | G   | 0.48 | -<br>0.005        | 0.006 | 0.400 |                    |                |                          |
| 1   | rs10789214  | T                         | C    | 0.57 | 0.014      | 0.002 | 3.81E-10 | T               | C   | 0.56 | 0.021             | 0.006 | 0.002 |                    |                |                          |
| 9   | rs1982277   | T(G)                      | C(C) | 0.76 | 0.021      | 0.003 | 1.28E-15 | G               | C   | 0.74 | 0.021             | 0.007 | 0.003 | rs10809535         | 1.0            |                          |
| 9   | rs10817969  | T                         | G    | 0.72 | 0.017      | 0.002 | 1.32E-12 | T               | G   | 0.72 | 0.003             | 0.007 | 0.690 |                    |                |                          |
| 1   | rs10890020  | A                         | G    | 0.52 | -<br>0.027 | 0.002 | 3.31E-34 | A               | G   | 0.51 | 0.004             | 0.006 | 0.540 |                    |                |                          |
| 1   | rs10913112  | T                         | C    | 0.38 | -<br>0.021 | 0.002 | 1.72E-20 | T               | C   | 0.38 | 0.004             | 0.007 | 0.590 |                    |                |                          |
| 3   | rs1095626   | T                         | C    | 0.58 | -<br>0.029 | 0.002 | 6.31E-39 | T               | C   | 0.58 | 0.018             | 0.006 | 0.006 |                    |                |                          |
| 5   | rs11135349  | A                         | C    | 0.47 | -<br>0.025 | 0.002 | 2.18E-30 | A               | C   | 0.46 | 0.013             | 0.006 | 0.049 |                    |                |                          |
| 1   | rs113188507 | A                         | G    | 0.28 | 0.023      | 0.003 | 2.94E-21 | A               | G   | 0.28 | 0.011             | 0.007 | 0.086 |                    |                |                          |
| 14  | rs1152578   | T                         | C    | 0.44 | -<br>0.015 | 0.002 | 4.19E-12 | T               | C   | 0.44 | 0.008             | 0.006 | 0.220 |                    |                |                          |
| 1   | rs11579246  | A                         | G    | 0.91 | 0.032      | 0.004 | 9.34E-18 | A               | G   | 0.90 | 0.014             | 0.011 | 0.190 |                    |                |                          |
| 2   | rs12052908  | A                         | T    | 0.53 | -<br>0.021 | 0.002 | 3.98E-22 | A               | T   | 0.52 | -<br>0.018        | 0.006 | 0.005 |                    |                | Yes                      |

|    |            |      |      |      |            |       |          |   |   |      |            |       |       |           |     |
|----|------------|------|------|------|------------|-------|----------|---|---|------|------------|-------|-------|-----------|-----|
| 2  | rs1226412  | T    | C    | 0.79 | 0.023      | 0.003 | 3.35E-18 | T | C | 0.80 | -<br>0.003 | 0.008 | 0.720 |           |     |
| 20 | rs12624433 | A    | G    | 0.26 | 0.019      | 0.003 | 2.16E-14 | A | G | 0.26 | 0.014      | 0.007 | 0.052 |           |     |
| 16 | rs12923444 | A    | C    | 0.56 | -<br>0.024 | 0.002 | 1.76E-24 | A | C | 0.56 | 0.005      | 0.006 | 0.400 |           |     |
| 18 | rs12966052 | C    | G    | 0.18 | -<br>0.019 | 0.003 | 3.76E-11 | C | G | 0.18 | 0.013      | 0.008 | 0.110 |           |     |
| 18 | rs12967143 | C    | G    | 0.70 | -<br>0.026 | 0.002 | 1.61E-27 | C | G | 0.71 | 0.010      | 0.007 | 0.140 |           |     |
| 18 | rs12967855 | A    | G    | 0.33 | 0.021      | 0.002 | 1.32E-19 | A | G | 0.33 | 0.013      | 0.007 | 0.068 |           |     |
| 3  | rs13084037 | A    | G    | 0.77 | -<br>0.022 | 0.003 | 1.79E-17 | A | G | 0.77 | 0.004      | 0.008 | 0.610 |           |     |
| 13 | rs1343605  | A    | C    | 0.38 | 0.023      | 0.002 | 1.62E-25 | A | C | 0.38 | 0.013      | 0.007 | 0.050 |           |     |
| 9  | rs1354115  | A    | C    | 0.62 | 0.019      | 0.002 | 4.39E-17 | A | C | 0.63 | -<br>0.001 | 0.007 | 0.870 |           |     |
| 13 | rs1409379  | T    | C    | 0.76 | 0.016      | 0.003 | 8.26E-11 | T | C | 0.76 | 0.016      | 0.007 | 0.029 |           |     |
| 11 | rs1448938  | A    | G    | 0.42 | 0.017      | 0.002 | 3.74E-15 | A | G | 0.42 | -<br>0.008 | 0.006 | 0.220 |           |     |
| 1  | rs1466887  | T    | C    | 0.55 | -<br>0.013 | 0.002 | 1.37E-08 | T | C | 0.55 | 0.002      | 0.007 | 0.760 |           |     |
| 2  | rs1568452  | T    | C    | 0.39 | 0.029      | 0.002 | 3.08E-40 | T | C | 0.38 | 0.010      | 0.007 | 0.140 |           |     |
| 7  | rs16887442 | T    | C    | 0.43 | 0.015      | 0.002 | 1.25E-11 | T | C | 0.43 | -<br>0.006 | 0.006 | 0.360 |           |     |
| 1  | rs169235   | A    | G    | 0.75 | -<br>0.017 | 0.003 | 1.61E-11 | A | G | 0.75 | -<br>0.015 | 0.007 | 0.044 |           |     |
| 1  | rs17641524 | T    | C    | 0.21 | -<br>0.024 | 0.003 | 7.90E-20 | T | C | 0.22 | 0.010      | 0.008 | 0.190 |           |     |
| 1  | rs1890946  | T    | C    | 0.47 | -<br>0.019 | 0.002 | 8.62E-19 | T | C | 0.47 | 0.003      | 0.006 | 0.640 |           |     |
| 6  | rs1933802  | C    | G    | 0.45 | -<br>0.020 | 0.002 | 1.36E-19 | C | G | 0.46 | 0.006      | 0.006 | 0.360 |           | Yes |
| 6  | rs9363467  | T(C) | C(T) | 0.60 | 0.016      | 0.002 | 2.50E-12 | C | T | 0.61 | 0.011      | 0.007 | 0.084 | rs1938082 | 1.0 |
| 14 | rs1956373  | T    | G    | 0.74 | -<br>0.017 | 0.003 | 6.08E-12 | T | G | 0.75 | 0.005      | 0.007 | 0.460 |           |     |

|    |             |      |      |      |            |       |          |   |   |      |            |       |       |                |
|----|-------------|------|------|------|------------|-------|----------|---|---|------|------------|-------|-------|----------------|
| 11 | rs198457    | T    | C    | 0.19 | -<br>0.021 | 0.003 | 5.41E-14 | T | C | 0.18 | 0.013      | 0.009 | 0.140 |                |
| 6  | rs200949    | A    | G    | 0.87 | 0.043      | 0.003 | 2.13E-37 | A | G | 0.88 | -<br>0.014 | 0.010 | 0.160 |                |
| 6  | rs2029865   | A    | T    | 0.45 | -<br>0.018 | 0.002 | 4.02E-17 | A | T | 0.45 | -<br>0.011 | 0.006 | 0.100 | Yes            |
| 7  | rs2043539   | A    | G    | 0.42 | 0.022      | 0.002 | 8.32E-24 | A | G | 0.41 | 0.023      | 0.007 | 0.000 |                |
| 7  | rs2247523   | C    | G    | 0.53 | -<br>0.016 | 0.002 | 9.05E-14 | C | G | 0.53 | -<br>0.014 | 0.006 | 0.032 | Yes            |
| 11 | rs2509805   | T    | C    | 0.32 | 0.019      | 0.002 | 4.92E-16 | T | C | 0.32 | -<br>0.008 | 0.007 | 0.240 |                |
| 1  | rs2568958   | A    | G    | 0.62 | 0.034      | 0.002 | 4.45E-52 | A | G | 0.61 | 0.025      | 0.007 | 0.000 |                |
| 9  | rs263645    | A    | T    | 0.54 | 0.018      | 0.002 | 6.92E-16 | A | T | 0.54 | 0.012      | 0.006 | 0.067 | Yes            |
| 9  | rs2670139   | T    | C    | 0.76 | -<br>0.018 | 0.003 | 1.84E-12 | T | C | 0.75 | -<br>0.038 | 0.007 | 0.000 |                |
| 6  | rs2876520   | C    | G    | 0.53 | -<br>0.019 | 0.002 | 2.65E-17 | C | G | 0.53 | -<br>0.006 | 0.006 | 0.350 | Yes            |
| 1  | rs301799    | T    | C    | 0.57 | -<br>0.025 | 0.002 | 4.05E-31 | T | C | 0.58 | -<br>0.002 | 0.006 | 0.820 |                |
| 5  | rs30266     | A    | G    | 0.33 | 0.032      | 0.002 | 1.99E-45 | A | G | 0.32 | 0.024      | 0.007 | 0.001 |                |
| 5  | rs3099439   | T    | C    | 0.53 | -<br>0.021 | 0.002 | 1.61E-21 | T | C | 0.53 | 0.016      | 0.006 | 0.013 |                |
| 12 | rs3213572   | A    | G    | 0.47 | 0.020      | 0.002 | 5.51E-20 | A | G | 0.47 | 0.032      | 0.006 | 0.000 |                |
| 15 | rs34488670  | T    | C    | 0.79 | -<br>0.019 | 0.003 | 4.69E-13 | T | C | 0.79 | -<br>0.011 | 0.008 | 0.150 |                |
| 9  | rs34653192  | C    | G    | 0.32 | -<br>0.020 | 0.002 | 3.39E-16 | C | G | 0.33 | -<br>0.007 | 0.007 | 0.330 |                |
| 4  | rs34937911  | T    | C    | 0.88 | 0.024      | 0.003 | 5.39E-13 | T | C | 0.88 | 0.000      | 0.010 | 0.990 |                |
| 3  | rs141954845 | A(G) | G(A) | 0.39 | 0.018      | 0.002 | 1.18E-15 | G | A | 0.41 | -<br>0.009 | 0.007 | 0.170 | rs35198002 1.0 |
| 4  | rs35553410  | T    | C    | 0.75 | -<br>0.016 | 0.003 | 2.18E-10 | T | C | 0.75 | 0.012      | 0.007 | 0.110 |                |
| 9  | rs3793577   | A    | G    | 0.47 | -<br>0.021 | 0.002 | 5.58E-22 | A | G | 0.47 | 0.007      | 0.006 | 0.270 |                |
| 7  | rs3823624   | T    | C    | 0.81 | 0.029      | 0.003 | 1.61E-26 | T | C | 0.80 | 0.030      | 0.008 | 0.000 |                |

|    |             |      |      |      |            |       |          |   |   |      |            |       |       |           |     |
|----|-------------|------|------|------|------------|-------|----------|---|---|------|------------|-------|-------|-----------|-----|
| 4  | rs45510091  | A    | G    | 0.95 | 0.046      | 0.005 | 7.74E-21 | A | G | 0.95 | 0.013      | 0.014 | 0.350 |           |     |
| 13 | rs4772087   | T    | C    | 0.37 | 0.021      | 0.002 | 2.34E-20 | T | C | 0.38 | 0.020      | 0.007 | 0.002 |           |     |
| 12 | rs56314503  | T    | G    | 0.75 | -<br>0.020 | 0.003 | 1.28E-16 | T | G | 0.76 | -<br>0.015 | 0.007 | 0.045 |           |     |
| 16 | rs56887639  | A    | G    | 0.73 | -<br>0.017 | 0.002 | 6.04E-13 | A | G | 0.73 | 0.004      | 0.007 | 0.630 |           |     |
| 11 | rs57344483  | A    | G    | 0.93 | -<br>0.024 | 0.004 | 5.26E-09 | A | G | 0.92 | 0.012      | 0.012 | 0.320 |           |     |
| 7  | rs58104186  | A    | G    | 0.47 | 0.019      | 0.002 | 3.56E-18 | A | G | 0.46 | 0.002      | 0.006 | 0.820 |           |     |
| 11 | rs58621819  | A    | T    | 0.79 | -<br>0.017 | 0.003 | 2.17E-10 | A | T | 0.80 | -<br>0.061 | 0.008 | 0.000 |           |     |
| 22 | rs5995992   | T    | C    | 0.72 | -<br>0.030 | 0.002 | 2.60E-35 | T | C | 0.72 | -<br>0.022 | 0.007 | 0.002 |           |     |
| 5  | rs60157091  | T    | C    | 0.52 | 0.021      | 0.002 | 5.54E-21 | T | C | 0.52 | -<br>0.010 | 0.006 | 0.100 |           |     |
| 20 | rs143186028 | T(C) | G(T) | 0.18 | 0.024      | 0.003 | 7.23E-18 | C | T | 0.19 | 0.011      | 0.008 | 0.160 | rs6072350 | 1.0 |
| 11 | rs61902811  | A    | G    | 0.37 | -<br>0.029 | 0.002 | 3.57E-39 | A | G | 0.36 | -<br>0.012 | 0.007 | 0.062 |           |     |
| 14 | rs61990288  | A    | G    | 0.51 | -<br>0.025 | 0.002 | 1.96E-31 | A | G | 0.50 | -<br>0.011 | 0.006 | 0.095 |           |     |
| 18 | rs62091461  | T    | C    | 0.23 | -<br>0.020 | 0.003 | 1.75E-14 | T | C | 0.24 | 0.013      | 0.007 | 0.088 |           |     |
| 2  | rs62188629  | A    | G    | 0.31 | 0.017      | 0.002 | 5.07E-13 | A | G | 0.32 | 0.010      | 0.007 | 0.160 |           |     |
| 3  | rs6783233   | T    | C    | 0.28 | 0.018      | 0.002 | 1.14E-13 | T | C | 0.28 | 0.001      | 0.007 | 0.950 |           |     |
| 9  | rs7030813   | T    | C    | 0.37 | 0.025      | 0.002 | 8.88E-30 | T | C | 0.38 | 0.018      | 0.007 | 0.006 |           |     |
| 11 | rs7117514   | A    | G    | 0.54 | -<br>0.017 | 0.002 | 3.64E-14 | A | G | 0.54 | 0.005      | 0.006 | 0.450 |           |     |
| 16 | rs7193263   | A    | G    | 0.67 | -<br>0.021 | 0.002 | 3.83E-19 | A | G | 0.67 | -<br>0.001 | 0.007 | 0.930 |           |     |
| 16 | rs7198928   | T    | C    | 0.62 | 0.022      | 0.002 | 3.71E-23 | T | C | 0.62 | -<br>0.005 | 0.007 | 0.490 |           |     |
| 16 | rs7200826   | T    | C    | 0.26 | 0.027      | 0.003 | 3.09E-28 | T | C | 0.27 | 0.004      | 0.007 | 0.600 |           |     |
| 18 | rs7227069   | A    | G    | 0.43 | 0.024      | 0.002 | 2.13E-28 | A | G | 0.44 | 0.001      | 0.006 | 0.850 |           |     |
| 18 | rs7241572   | A    | G    | 0.20 | 0.020      | 0.003 | 2.56E-13 | A | G | 0.20 | 0.019      | 0.008 | 0.020 |           |     |

|    |            |   |   |      |            |       |          |    |    |      |            |       |       |      |
|----|------------|---|---|------|------------|-------|----------|----|----|------|------------|-------|-------|------|
| 6  | rs725616   | T | C | 0.36 | 0.014      | 0.002 | 1.06E-09 | T  | C  | 0.36 | 0.020      | 0.007 | 0.003 |      |
| 1  | rs72710803 | A | C | 0.91 | -<br>0.025 | 0.004 | 1.35E-10 | A  | C  | 0.92 | -<br>0.020 | 0.012 | 0.090 |      |
| 17 | rs75581564 | A | G | 0.12 | 0.025      | 0.003 | 3.49E-13 | A  | G  | 0.11 | 0.003      | 0.010 | 0.790 |      |
| 2  | rs7585722  | T | C | 0.85 | -<br>0.022 | 0.003 | 5.47E-13 | T  | C  | 0.85 | 0.018      | 0.009 | 0.047 |      |
| 4  | rs7685686  | A | G | 0.58 | 0.017      | 0.002 | 5.52E-15 | A  | G  | 0.57 | 0.021      | 0.007 | 0.002 |      |
| 6  | rs7758630  | A | T | 0.41 | -<br>0.017 | 0.002 | 7.79E-14 | A  | T  | 0.40 | 0.001      | 0.007 | 0.900 |      |
| 7  | rs7807677  | T | C | 0.55 | 0.021      | 0.002 | 5.40E-22 | T  | C  | 0.57 | 0.022      | 0.006 | 0.000 |      |
| 12 | rs78337797 | T | G | 0.88 | 0.023      | 0.003 | 1.37E-11 | T  | G  | 0.88 | -<br>0.022 | 0.010 | 0.025 |      |
| 8  | rs7837935  | T | G | 0.15 | -<br>0.023 | 0.003 | 1.15E-13 | T  | G  | 0.15 | -<br>0.019 | 0.009 | 0.036 |      |
| 11 | rs7932640  | T | C | 0.44 | 0.023      | 0.002 | 3.40E-25 | T  | C  | 0.45 | 0.010      | 0.006 | 0.110 |      |
| 15 | rs8037355  | T | C | 0.56 | -<br>0.019 | 0.002 | 1.52E-18 | T  | C  | 0.55 | -<br>0.006 | 0.006 | 0.350 |      |
| 9  | rs913930   | A | G | 0.64 | -<br>0.022 | 0.002 | 1.03E-21 | A  | G  | 0.64 | -<br>0.007 | 0.007 | 0.290 |      |
| 13 | rs9545360  | A | C | 0.18 | -<br>0.017 | 0.003 | 6.70E-09 | A  | C  | 0.18 | 0.013      | 0.008 | 0.110 |      |
| 13 | rs9592461  | A | G | 0.49 | 0.024      | 0.002 | 1.17E-28 | A  | G  | 0.48 | 0.009      | 0.006 | 0.170 |      |
| 10 | rs997934   | T | C | 0.38 | 0.016      | 0.002 | 4.60E-13 | T  | C  | 0.38 | -<br>0.005 | 0.007 | 0.420 |      |
| 8  | rs67436663 | G | C | 0.24 | 0.014      | 0.003 | 2.83E-08 | NA | NA | NA   | NA         | NA    | NA    | <0.9 |

Chr indicates chromosome; SNP, single nucleotide polymorphism; EA, effect allele; NEA, non-effect allele; EAF, effect allele frequency; SE, standard error.

<sup>a</sup> Beta presents natural logarithm of odds ratio.

<sup>#</sup> Genetic variants which were not available in the outcome summary statistics data were replaced by their proxies ( $R^2 > 0.90$ ). The effect allele and non-effect allele of proxies were noted in the brackets.

\* Palindromic SNPs with minor allele frequency of  $> 0.42$  were considered to be strand-ambiguous and removed from final analysis.

**ESM Table 3. Characteristics of the single-nucleotide polymorphisms associated with major depressive disorder and their associations with coronary artery disease**

| Chr | SNP         | Major depressive disorder |     |      |                   |       |          | Coronary artery disease |     |      |                   |       |          | Ambiguous<br>palindrome* |
|-----|-------------|---------------------------|-----|------|-------------------|-------|----------|-------------------------|-----|------|-------------------|-------|----------|--------------------------|
|     |             | EA                        | NEA | EAF  | Beta <sup>a</sup> | SE    | P        | EA                      | NEA | EAF  | Beta <sup>a</sup> | SE    | P        |                          |
| 1   | rs1002656   | T                         | C   | 0.70 | -0.021            | 0.002 | 4.84E-19 | T                       | C   | 0.64 | -0.001            | 0.010 | 8.85E-01 |                          |
| 5   | rs10061069  | C                         | G   | 0.22 | -0.025            | 0.003 | 5.17E-22 | C                       | G   | 0.20 | -0.023            | 0.012 | 5.99E-02 |                          |
| 14  | rs10149470  | A                         | G   | 0.49 | -0.021            | 0.002 | 6.88E-22 | A                       | G   | 0.52 | -0.009            | 0.009 | 3.43E-01 |                          |
| 10  | rs1021363   | A                         | G   | 0.35 | 0.023             | 0.002 | 3.77E-23 | A                       | G   | 0.37 | 0.015             | 0.010 | 1.20E-01 |                          |
| 14  | rs1045430   | T                         | G   | 0.48 | -0.023            | 0.002 | 4.44E-25 | T                       | G   | 0.51 | -0.004            | 0.009 | 6.97E-01 |                          |
| 1   | rs10789214  | T                         | C   | 0.57 | 0.014             | 0.002 | 3.81E-10 | T                       | C   | 0.62 | 0.002             | 0.010 | 8.18E-01 |                          |
| 9   | rs10817969  | T                         | G   | 0.72 | 0.017             | 0.002 | 1.32E-12 | T                       | G   | 0.73 | 0.008             | 0.010 | 4.29E-01 |                          |
| 1   | rs10890020  | A                         | G   | 0.52 | -0.027            | 0.002 | 3.31E-34 | A                       | G   | 0.55 | -0.005            | 0.009 | 6.23E-01 |                          |
| 1   | rs10913112  | T                         | C   | 0.38 | -0.021            | 0.002 | 1.72E-20 | T                       | C   | 0.36 | -0.014            | 0.010 | 1.54E-01 |                          |
| 3   | rs1095626   | T                         | C   | 0.58 | -0.029            | 0.002 | 6.31E-39 | T                       | C   | 0.59 | 0.000             | 0.009 | 9.76E-01 |                          |
| 5   | rs11135349  | A                         | C   | 0.47 | -0.025            | 0.002 | 2.18E-30 | A                       | C   | 0.46 | 0.001             | 0.009 | 8.99E-01 |                          |
| 1   | rs113188507 | A                         | G   | 0.28 | 0.023             | 0.003 | 2.94E-21 | A                       | G   | 0.26 | 0.008             | 0.011 | 4.27E-01 |                          |
| 14  | rs1152578   | T                         | C   | 0.44 | -0.015            | 0.002 | 4.19E-12 | T                       | C   | 0.44 | 0.012             | 0.009 | 2.03E-01 |                          |
| 1   | rs11579246  | A                         | G   | 0.91 | 0.032             | 0.004 | 8.07E-18 | A                       | G   | 0.88 | -0.009            | 0.014 | 5.12E-01 |                          |
| 2   | rs12052908  | A                         | T   | 0.53 | -0.021            | 0.002 | 3.98E-22 | A                       | T   | 0.51 | -0.018            | 0.010 | 6.46E-02 | Yes                      |
| 2   | rs1226412   | T                         | C   | 0.79 | 0.023             | 0.003 | 3.35E-18 | T                       | C   | 0.74 | -0.005            | 0.011 | 6.30E-01 |                          |
| 20  | rs12624433  | A                         | G   | 0.26 | 0.019             | 0.003 | 2.16E-14 | A                       | G   | 0.25 | 0.006             | 0.011 | 5.54E-01 |                          |
| 16  | rs12923444  | A                         | C   | 0.56 | -0.024            | 0.002 | 1.76E-24 | A                       | C   | 0.60 | 0.004             | 0.010 | 7.08E-01 |                          |
| 18  | rs12966052  | C                         | G   | 0.18 | -0.019            | 0.003 | 3.76E-11 | C                       | G   | 0.17 | 0.000             | 0.013 | 9.74E-01 |                          |
| 18  | rs12967143  | C                         | G   | 0.70 | -0.026            | 0.002 | 1.61E-27 | C                       | G   | 0.67 | -0.007            | 0.010 | 4.91E-01 |                          |
| 18  | rs12967855  | A                         | G   | 0.33 | 0.021             | 0.002 | 1.32E-19 | A                       | G   | 0.37 | -0.010            | 0.010 | 3.25E-01 |                          |
| 3   | rs13084037  | A                         | G   | 0.77 | -0.022            | 0.003 | 1.79E-17 | A                       | G   | 0.79 | -0.010            | 0.012 | 4.09E-01 |                          |
| 13  | rs1343605   | A                         | C   | 0.38 | 0.023             | 0.002 | 1.62E-25 | A                       | C   | 0.38 | 0.009             | 0.010 | 3.57E-01 |                          |
| 9   | rs1354115   | A                         | C   | 0.62 | 0.019             | 0.002 | 4.39E-17 | A                       | C   | 0.64 | 0.018             | 0.010 | 7.35E-02 |                          |

|    |             |   |   |      |        |       |          |   |   |      |        |       |          |     |
|----|-------------|---|---|------|--------|-------|----------|---|---|------|--------|-------|----------|-----|
| 13 | rs1409379   | T | C | 0.76 | 0.016  | 0.003 | 8.26E-11 | T | C | 0.72 | -0.001 | 0.010 | 9.57E-01 |     |
| 3  | rs141954845 | A | G | 0.39 | 0.018  | 0.002 | 1.18E-15 | A | G | 0.37 | -0.009 | 0.010 | 3.68E-01 |     |
| 20 | rs143186028 | T | G | 0.18 | 0.024  | 0.003 | 7.23E-18 | T | G | 0.15 | -0.012 | 0.013 | 3.90E-01 |     |
| 11 | rs1448938   | A | G | 0.42 | 0.017  | 0.002 | 3.74E-15 | A | G | 0.45 | 0.006  | 0.009 | 4.91E-01 |     |
| 1  | rs1466887   | T | C | 0.55 | -0.013 | 0.002 | 1.37E-08 | T | C | 0.55 | 0.005  | 0.010 | 6.37E-01 |     |
| 2  | rs1568452   | T | C | 0.39 | 0.029  | 0.002 | 3.08E-40 | T | C | 0.37 | 0.013  | 0.010 | 1.88E-01 |     |
| 7  | rs16887442  | T | C | 0.43 | 0.015  | 0.002 | 1.25E-11 | T | C | 0.46 | -0.008 | 0.009 | 3.92E-01 |     |
| 1  | rs169235    | A | G | 0.75 | -0.017 | 0.003 | 1.61E-11 | A | G | 0.75 | -0.005 | 0.011 | 6.15E-01 |     |
| 1  | rs17641524  | T | C | 0.21 | -0.024 | 0.003 | 7.90E-20 | T | C | 0.20 | 0.020  | 0.012 | 8.62E-02 |     |
| 1  | rs1890946   | T | C | 0.47 | -0.019 | 0.002 | 8.62E-19 | T | C | 0.48 | 0.008  | 0.010 | 4.19E-01 |     |
| 6  | rs1933802   | C | G | 0.45 | -0.020 | 0.002 | 1.36E-19 | C | G | 0.46 | -0.012 | 0.009 | 2.06E-01 | Yes |
| 14 | rs1956373   | T | G | 0.74 | -0.017 | 0.003 | 6.08E-12 | T | G | 0.72 | 0.012  | 0.010 | 2.44E-01 |     |
| 9  | rs1982277   | T | C | 0.76 | 0.021  | 0.003 | 1.28E-15 | T | C | 0.79 | 0.007  | 0.012 | 5.53E-01 |     |
| 11 | rs198457    | T | C | 0.19 | -0.021 | 0.003 | 5.41E-14 | T | C | 0.17 | 0.001  | 0.014 | 9.58E-01 |     |
| 6  | rs200949    | A | G | 0.87 | 0.043  | 0.003 | 2.13E-37 | A | G | 0.88 | -0.003 | 0.015 | 8.34E-01 |     |
| 6  | rs2029865   | A | T | 0.45 | -0.018 | 0.002 | 4.02E-17 | A | T | 0.43 | -0.013 | 0.009 | 1.52E-01 | Yes |
| 7  | rs2043539   | A | G | 0.42 | 0.022  | 0.002 | 8.32E-24 | A | G | 0.45 | 0.027  | 0.009 | 3.55E-03 |     |
| 7  | rs2247523   | C | G | 0.53 | -0.016 | 0.002 | 9.05E-14 | C | G | 0.52 | -0.006 | 0.009 | 5.05E-01 | Yes |
| 11 | rs2509805   | T | C | 0.32 | 0.019  | 0.002 | 4.92E-16 | T | C | 0.36 | -0.011 | 0.010 | 2.84E-01 |     |
| 1  | rs2568958   | A | G | 0.62 | 0.034  | 0.002 | 4.45E-52 | A | G | 0.61 | 0.011  | 0.010 | 2.72E-01 |     |
| 9  | rs263645    | A | T | 0.54 | 0.018  | 0.002 | 6.92E-16 | A | T | 0.53 | 0.010  | 0.009 | 2.75E-01 | Yes |
| 9  | rs2670139   | T | C | 0.76 | -0.018 | 0.003 | 2.19E-12 | T | C | 0.72 | -0.015 | 0.010 | 1.60E-01 |     |
| 6  | rs2876520   | C | G | 0.53 | -0.019 | 0.002 | 2.65E-17 | C | G | 0.54 | 0.004  | 0.010 | 6.65E-01 | Yes |
| 1  | rs301799    | T | C | 0.57 | -0.025 | 0.002 | 4.05E-31 | T | C | 0.55 | 0.016  | 0.009 | 9.27E-02 |     |
| 5  | rs30266     | A | G | 0.33 | 0.032  | 0.002 | 1.99E-45 | A | G | 0.32 | 0.007  | 0.010 | 4.91E-01 |     |
| 5  | rs3099439   | T | C | 0.53 | -0.021 | 0.002 | 1.61E-21 | T | C | 0.51 | 0.017  | 0.010 | 8.24E-02 |     |
| 12 | rs3213572   | A | G | 0.47 | 0.020  | 0.002 | 5.51E-20 | A | G | 0.47 | 0.021  | 0.009 | 2.26E-02 |     |
| 15 | rs34488670  | T | C | 0.79 | -0.019 | 0.003 | 4.69E-13 | T | C | 0.81 | 0.012  | 0.012 | 3.26E-01 |     |
| 9  | rs34653192  | C | G | 0.32 | -0.020 | 0.002 | 3.39E-16 | C | G | 0.27 | -0.015 | 0.011 | 1.95E-01 |     |
| 4  | rs34937911  | T | C | 0.88 | 0.024  | 0.003 | 5.39E-13 | T | C | 0.89 | 0.025  | 0.015 | 9.75E-02 |     |



---

|    |            |   |   |      |        |       |          |   |   |      |        |       |          |
|----|------------|---|---|------|--------|-------|----------|---|---|------|--------|-------|----------|
| 4  | rs35553410 | T | C | 0.75 | -0.016 | 0.003 | 2.18E-10 | T | C | 0.77 | 0.008  | 0.011 | 4.51E-01 |
| 9  | rs3793577  | A | G | 0.47 | -0.021 | 0.002 | 5.58E-22 | A | G | 0.48 | -0.007 | 0.009 | 4.36E-01 |
| 7  | rs3823624  | T | C | 0.81 | 0.029  | 0.003 | 1.61E-26 | T | C | 0.79 | 0.023  | 0.011 | 4.54E-02 |
| 3  | rs4346585  | T | C | 0.70 | -0.016 | 0.002 | 4.87E-12 | T | C | 0.75 | -0.019 | 0.012 | 1.06E-01 |
| 4  | rs45510091 | A | G | 0.95 | 0.046  | 0.005 | 7.74E-21 | A | G | 0.96 | -0.020 | 0.025 | 4.32E-01 |
| 13 | rs4772087  | T | C | 0.37 | 0.021  | 0.002 | 2.34E-20 | T | C | 0.35 | -0.007 | 0.010 | 4.65E-01 |
| 12 | rs56314503 | T | G | 0.75 | -0.020 | 0.003 | 1.28E-16 | T | G | 0.76 | -0.016 | 0.011 | 1.49E-01 |
| 16 | rs56887639 | A | G | 0.73 | -0.017 | 0.002 | 6.04E-13 | A | G | 0.73 | -0.010 | 0.010 | 3.60E-01 |
| 11 | rs57344483 | A | G | 0.93 | -0.024 | 0.004 | 5.26E-09 | A | G | 0.90 | -0.016 | 0.016 | 3.05E-01 |
| 7  | rs58104186 | A | G | 0.47 | 0.019  | 0.002 | 3.56E-18 | A | G | 0.48 | 0.011  | 0.009 | 2.25E-01 |
| 11 | rs58621819 | A | T | 0.79 | -0.017 | 0.003 | 2.17E-10 | A | T | 0.82 | 0.001  | 0.013 | 9.41E-01 |
| 22 | rs5995992  | T | C | 0.72 | -0.030 | 0.002 | 2.60E-35 | T | C | 0.73 | 0.009  | 0.010 | 3.74E-01 |
| 5  | rs60157091 | T | C | 0.52 | 0.021  | 0.002 | 5.54E-21 | T | C | 0.51 | -0.013 | 0.010 | 1.75E-01 |
| 11 | rs61902811 | A | G | 0.37 | -0.029 | 0.002 | 5.17E-39 | A | G | 0.32 | -0.011 | 0.010 | 2.90E-01 |
| 14 | rs61990288 | A | G | 0.51 | -0.025 | 0.002 | 1.96E-31 | A | G | 0.44 | -0.012 | 0.010 | 2.09E-01 |
| 18 | rs62091461 | T | C | 0.23 | -0.020 | 0.003 | 1.75E-14 | T | C | 0.24 | -0.010 | 0.011 | 3.55E-01 |
| 2  | rs62188629 | A | G | 0.31 | 0.017  | 0.002 | 6.15E-13 | A | G | 0.30 | -0.010 | 0.011 | 3.43E-01 |
| 8  | rs67436663 | C | G | 0.24 | -0.014 | 0.003 | 2.83E-08 | C | G | 0.26 | -0.008 | 0.011 | 4.71E-01 |
| 3  | rs6783233  | T | C | 0.28 | 0.018  | 0.002 | 1.14E-13 | T | C | 0.26 | -0.003 | 0.011 | 7.50E-01 |
| 9  | rs7030813  | T | C | 0.37 | 0.025  | 0.002 | 8.88E-30 | T | C | 0.39 | 0.008  | 0.010 | 4.17E-01 |
| 11 | rs7117514  | A | G | 0.54 | -0.017 | 0.002 | 3.64E-14 | A | G | 0.58 | -0.002 | 0.009 | 8.47E-01 |
| 16 | rs7193263  | A | G | 0.67 | -0.021 | 0.002 | 3.83E-19 | A | G | 0.63 | -0.010 | 0.010 | 3.34E-01 |
| 16 | rs7198928  | T | C | 0.62 | 0.022  | 0.002 | 3.71E-23 | T | C | 0.63 | 0.001  | 0.010 | 8.91E-01 |
| 16 | rs7200826  | T | C | 0.26 | 0.027  | 0.003 | 3.09E-28 | T | C | 0.24 | 0.020  | 0.011 | 6.25E-02 |
| 18 | rs7227069  | A | G | 0.43 | 0.024  | 0.002 | 2.13E-28 | A | G | 0.37 | 0.007  | 0.010 | 4.76E-01 |
| 18 | rs7241572  | A | G | 0.20 | 0.020  | 0.003 | 2.56E-13 | A | G | 0.18 | -0.003 | 0.013 | 7.92E-01 |
| 6  | rs725616   | T | C | 0.36 | 0.014  | 0.002 | 1.06E-09 | T | C | 0.35 | 0.001  | 0.010 | 9.02E-01 |
| 1  | rs72710803 | A | C | 0.91 | -0.025 | 0.004 | 1.35E-10 | A | C | 0.91 | -0.010 | 0.016 | 5.39E-01 |
| 17 | rs75581564 | A | G | 0.12 | 0.025  | 0.003 | 3.49E-13 | A | G | 0.10 | -0.007 | 0.017 | 6.61E-01 |
| 2  | rs7585722  | T | C | 0.85 | -0.022 | 0.003 | 5.47E-13 | T | C | 0.85 | 0.027  | 0.014 | 6.17E-02 |

---

|    |            |   |   |      |        |       |          |   |   |      |        |       |          |
|----|------------|---|---|------|--------|-------|----------|---|---|------|--------|-------|----------|
| 4  | rs7685686  | A | G | 0.58 | 0.017  | 0.002 | 5.52E-15 | A | G | 0.59 | 0.010  | 0.009 | 2.71E-01 |
| 6  | rs7758630  | A | T | 0.41 | -0.017 | 0.002 | 7.79E-14 | A | T | 0.37 | 0.008  | 0.010 | 4.28E-01 |
| 7  | rs7807677  | T | C | 0.55 | 0.021  | 0.002 | 5.40E-22 | T | C | 0.56 | 0.020  | 0.009 | 3.35E-02 |
| 12 | rs78337797 | T | G | 0.88 | 0.023  | 0.003 | 1.37E-11 | T | G | 0.89 | -0.002 | 0.017 | 9.19E-01 |
| 8  | rs7837935  | T | G | 0.15 | -0.023 | 0.003 | 1.15E-13 | T | G | 0.18 | -0.015 | 0.012 | 2.25E-01 |
| 11 | rs7932640  | T | C | 0.44 | 0.023  | 0.002 | 3.40E-25 | T | C | 0.43 | -0.006 | 0.009 | 5.49E-01 |
| 15 | rs8037355  | T | C | 0.56 | -0.019 | 0.002 | 1.52E-18 | T | C | 0.55 | 0.011  | 0.009 | 2.43E-01 |
| 9  | rs913930   | A | G | 0.64 | -0.022 | 0.002 | 1.03E-21 | A | G | 0.65 | -0.008 | 0.010 | 4.28E-01 |
| 6  | rs9363467  | T | C | 0.60 | 0.016  | 0.002 | 2.50E-12 | T | C | 0.61 | 0.009  | 0.010 | 3.31E-01 |
| 13 | rs9545360  | A | C | 0.18 | -0.017 | 0.003 | 6.70E-09 | A | C | 0.16 | 0.003  | 0.013 | 7.98E-01 |
| 13 | rs9592461  | A | G | 0.49 | 0.024  | 0.002 | 1.17E-28 | A | G | 0.52 | 0.010  | 0.009 | 2.91E-01 |
| 10 | rs997934   | T | C | 0.38 | 0.016  | 0.002 | 4.60E-13 | T | C | 0.39 | -0.013 | 0.009 | 1.80E-01 |

Chr indicates chromosome; SNP, single nucleotide polymorphism; EA, effect allele; NEA, non-effect allele; EAF, effect allele frequency; SE, standard error.

<sup>a</sup> Beta presents natural logarithm of odds ratio.

\* Palindromic SNPs with minor allele frequency of >0.42 were considered to be strand-ambiguous and removed from final analysis.

**ESM Table 4. Characteristics of the single-nucleotide polymorphisms associated with major depressive disorder and their associations with heart failure**

| Chr | SNP         | Major depressive disorder |     |      |                   |        |          | Heart failure |     |        |                   |        | Traits associated with outlier SNP <sup>#</sup> | Ambiguous palindrome* |     |
|-----|-------------|---------------------------|-----|------|-------------------|--------|----------|---------------|-----|--------|-------------------|--------|-------------------------------------------------|-----------------------|-----|
|     |             | EA                        | NEA | EAF  | Beta <sup>a</sup> | SE     | P        | E<br>A        | NEA | EAF    | Beta <sup>a</sup> | SE     |                                                 |                       | P   |
| 1   | rs1002656   | T                         | C   | 0.70 | -0.02             | 0.0024 | 4.84E-19 | T             | C   | 0.7148 | -0.003            | 0.0088 | 0.73                                            |                       |     |
| 5   | rs10061069  | C                         | G   | 0.22 | -0.03             | 0.0026 | 5.17E-22 | C             | G   | 0.2076 | 0.010             | 0.0097 | 0.32                                            |                       |     |
| 14  | rs10149470  | A                         | G   | 0.49 | -0.02             | 0.0021 | 6.88E-22 | A             | G   | 0.4926 | -0.005            | 0.0079 | 0.50                                            |                       |     |
| 10  | rs1021363   | A                         | G   | 0.35 | 0.02              | 0.0023 | 3.77E-23 | A             | G   | 0.3485 | 0.015             | 0.0082 | 0.07                                            |                       |     |
| 14  | rs1045430   | T                         | G   | 0.48 | -0.02             | 0.0022 | 4.44E-25 | T             | G   | 0.4776 | 0.002             | 0.0079 | 0.85                                            |                       |     |
| 1   | rs10789214  | T                         | C   | 0.57 | 0.01              | 0.0022 | 3.81E-10 | T             | C   | 0.5643 | 0.022             | 0.0080 | 0.01                                            |                       |     |
| 9   | rs10817969  | T                         | G   | 0.72 | 0.02              | 0.0024 | 1.32E-12 | T             | G   | 0.7184 | 0.014             | 0.0087 | 0.11                                            |                       |     |
| 1   | rs10890020  | A                         | G   | 0.52 | -0.03             | 0.0022 | 3.31E-34 | A             | G   | 0.508  | -0.008            | 0.0079 | 0.35                                            |                       |     |
| 1   | rs10913112  | T                         | C   | 0.38 | -0.02             | 0.0023 | 1.72E-20 | T             | C   | 0.3855 | -6.00E-04         | 0.0083 | 0.95                                            |                       |     |
| 3   | rs1095626   | T                         | C   | 0.58 | -0.03             | 0.0022 | 6.31E-39 | T             | C   | 0.5833 | 0.014             | 0.0079 | 0.08                                            |                       |     |
| 5   | rs11135349  | A                         | C   | 0.47 | -0.03             | 0.0022 | 2.18E-30 | A             | C   | 0.4539 | 0.006             | 0.0079 | 0.42                                            |                       |     |
| 20  | rs112768123 | G                         | C   | 0.18 | 0.02              | 0.0028 | 7.23E-18 | G             | C   | 0.1984 | -0.002            | 0.0098 | 0.83                                            |                       |     |
| 1   | rs113188507 | A                         | G   | 0.28 | 0.02              | 0.0025 | 2.94E-21 | A             | G   | 0.2786 | 0.009             | 0.0087 | 0.29                                            |                       |     |
| 14  | rs1152578   | T                         | C   | 0.44 | -0.02             | 0.0022 | 4.19E-12 | T             | C   | 0.4395 | 0.012             | 0.0079 | 0.14                                            |                       |     |
| 1   | rs11579246  | A                         | G   | 0.91 | 0.03              | 0.0037 | 8.07E-18 | A             | G   | 0.8973 | 0.010             | 0.0133 | 0.44                                            |                       |     |
| 2   | rs12052908  | A                         | T   | 0.53 | -0.02             | 0.0022 | 3.98E-22 | A             | T   | 0.5242 | -0.019            | 0.0079 | 0.02                                            |                       | Yes |
| 2   | rs1226412   | T                         | C   | 0.79 | 0.02              | 0.0027 | 3.35E-18 | T             | C   | 0.7982 | -0.001            | 0.0098 | 0.92                                            |                       |     |

|    |            |   |   |      |       |        |          |   |   |        |           |        |      |                                              |
|----|------------|---|---|------|-------|--------|----------|---|---|--------|-----------|--------|------|----------------------------------------------|
| 20 | rs12624433 | A | G | 0.26 | 0.02  | 0.0025 | 2.16E-14 | A | G | 0.2533 | 0.019     | 0.0090 | 0.04 |                                              |
| 16 | rs12923444 | A | C | 0.56 | -0.02 | 0.0023 | 1.76E-24 | A | C | 0.5628 | 0.005     | 0.0079 | 0.53 |                                              |
| 18 | rs12966052 | C | G | 0.18 | -0.02 | 0.0028 | 3.76E-11 | C | G | 0.1818 | 0.007     | 0.0101 | 0.51 |                                              |
| 18 | rs12967143 | C | G | 0.70 | -0.03 | 0.0024 | 1.61E-27 | C | G | 0.7148 | -0.020    | 0.0087 | 0.02 | Unipolar depression<br>Wellbeing measurement |
| 18 | rs12967855 | A | G | 0.33 | 0.02  | 0.0023 | 1.32E-19 | A | G | 0.329  | 0.003     | 0.0083 | 0.73 |                                              |
| 3  | rs13058913 | T | A | 0.70 | -0.02 | 0.0024 | 4.87E-12 | T | A | 0.6819 | 0.009     | 0.0084 | 0.30 |                                              |
| 3  | rs13084037 | A | G | 0.77 | -0.02 | 0.0025 | 1.79E-17 | A | G | 0.7765 | -0.011    | 0.0094 | 0.26 |                                              |
| 13 | rs1343605  | A | C | 0.38 | 0.02  | 0.0022 | 1.62E-25 | A | C | 0.3802 | 0.012     | 0.0081 | 0.13 |                                              |
| 9  | rs1354115  | A | C | 0.62 | 0.02  | 0.0022 | 4.39E-17 | A | C | 0.6341 | -0.003    | 0.0081 | 0.70 |                                              |
| 13 | rs1409379  | T | C | 0.76 | 0.02  | 0.0025 | 8.26E-11 | T | C | 0.7615 | 0.003     | 0.0092 | 0.76 |                                              |
| 11 | rs1448938  | A | G | 0.42 | 0.02  | 0.0022 | 3.74E-15 | A | G | 0.4134 | 0.015     | 0.0079 | 0.05 |                                              |
| 1  | rs1466887  | T | C | 0.55 | -0.01 | 0.0022 | 1.37E-08 | T | C | 0.5524 | 0.007     | 0.0079 | 0.39 |                                              |
| 3  | rs1554599  | G | A | 0.39 | 0.02  | 0.0022 | 1.18E-15 | G | A | 0.4225 | -0.007    | 0.0079 | 0.40 |                                              |
| 2  | rs1568452  | T | C | 0.39 | 0.03  | 0.0022 | 3.08E-40 | T | C | 0.3714 | -0.002    | 0.0081 | 0.77 |                                              |
| 7  | rs16887442 | T | C | 0.43 | 0.01  | 0.0022 | 1.25E-11 | T | C | 0.4316 | 0.009     | 0.0079 | 0.28 |                                              |
| 1  | rs169235   | A | G | 0.75 | -0.02 | 0.0025 | 1.61E-11 | A | G | 0.751  | -9.00E-04 | 0.0090 | 0.92 |                                              |
| 1  | rs17641524 | T | C | 0.21 | -0.02 | 0.0027 | 7.90E-20 | T | C | 0.2292 | 0.008     | 0.0095 | 0.39 |                                              |
| 1  | rs1890946  | T | C | 0.47 | -0.02 | 0.0022 | 8.62E-19 | T | C | 0.474  | -0.009    | 0.0078 | 0.23 |                                              |
| 6  | rs1933802  | C | G | 0.45 | -0.02 | 0.0022 | 1.36E-19 | C | G | 0.4585 | 0.004     | 0.0078 | 0.63 | Yes                                          |
| 14 | rs1956373  | T | G | 0.74 | -0.02 | 0.0025 | 6.08E-12 | T | G | 0.7513 | -0.005    | 0.0091 | 0.57 |                                              |
| 11 | rs198457   | T | C | 0.19 | -0.02 | 0.0028 | 5.41E-14 | T | C | 0.1755 | 0.005     | 0.0106 | 0.66 |                                              |
| 6  | rs200949   | A | G | 0.87 | 0.04  | 0.0034 | 2.13E-37 | A | G | 0.875  | -0.010    | 0.0151 | 0.49 |                                              |
| 6  | rs2029865  | A | T | 0.45 | -0.02 | 0.0022 | 4.02E-17 | A | T | 0.4587 | -0.011    | 0.0078 | 0.15 | Yes                                          |
| 7  | rs2043539  | A | G | 0.42 | 0.02  | 0.0022 | 8.32E-24 | A | G | 0.4116 | 0.021     | 0.0079 | 0.01 | Unipolar depression                          |

|    |            |   |   |      |       |        |          |   |   |        |        |        |      |                                       |     |
|----|------------|---|---|------|-------|--------|----------|---|---|--------|--------|--------|------|---------------------------------------|-----|
| 7  | rs2247523  | C | G | 0.53 | -0.02 | 0.0021 | 9.05E-14 | C | G | 0.5314 | 0.011  | 0.0078 | 0.16 |                                       | Yes |
| 11 | rs2509805  | T | C | 0.32 | 0.02  | 0.0024 | 4.92E-16 | T | C | 0.3319 | -0.004 | 0.0084 | 0.67 |                                       |     |
| 1  | rs2568958  | A | G | 0.62 | 0.03  | 0.0022 | 4.45E-52 | A | G | 0.6068 | 0.004  | 0.0080 | 0.60 |                                       |     |
| 9  | rs263645   | A | T | 0.54 | 0.02  | 0.0022 | 6.92E-16 | A | T | 0.5343 | -0.003 | 0.0077 | 0.72 |                                       | Yes |
| 9  | rs2670139  | T | C | 0.76 | -0.02 | 0.0025 | 2.19E-12 | T | C | 0.7482 | -0.011 | 0.0091 | 0.24 |                                       |     |
| 6  | rs2876520  | C | G | 0.53 | -0.02 | 0.0022 | 2.65E-17 | C | G | 0.5268 | -0.011 | 0.0079 | 0.17 |                                       | Yes |
| 1  | rs301799   | T | C | 0.57 | -0.03 | 0.0022 | 4.05E-31 | T | C | 0.5824 | 0.019  | 0.0079 | 0.02 |                                       |     |
| 5  | rs30266    | A | G | 0.33 | 0.03  | 0.0023 | 1.99E-45 | A | G | 0.3167 | 0.005  | 0.0084 | 0.52 |                                       |     |
| 5  | rs3099439  | T | C | 0.53 | -0.02 | 0.0022 | 1.61E-21 | T | C | 0.5374 | 0.004  | 0.0079 | 0.62 |                                       |     |
| 12 | rs3213572  | A | G | 0.47 | 0.02  | 0.0021 | 5.51E-20 | A | G | 0.4609 | 0.017  | 0.0079 | 0.04 | Unipolar depression                   |     |
| 15 | rs34488670 | T | C | 0.79 | -0.02 | 0.0027 | 4.69E-13 | T | C | 0.7865 | 0.005  | 0.0096 | 0.64 |                                       |     |
| 9  | rs34653192 | C | G | 0.32 | -0.02 | 0.0024 | 3.39E-16 | C | G | 0.333  | -0.007 | 0.0086 | 0.39 |                                       |     |
| 4  | rs34937911 | T | C | 0.88 | 0.02  | 0.0034 | 5.39E-13 | T | C | 0.8791 | 0.008  | 0.0121 | 0.52 |                                       |     |
| 4  | rs35553410 | T | C | 0.75 | -0.02 | 0.0025 | 2.18E-10 | T | C | 0.7444 | 0.005  | 0.0090 | 0.55 |                                       |     |
| 9  | rs3793577  | A | G | 0.47 | -0.02 | 0.0022 | 5.58E-22 | A | G | 0.4701 | 0.009  | 0.0080 | 0.26 |                                       |     |
| 7  | rs3823624  | T | C | 0.81 | 0.03  | 0.0028 | 1.61E-26 | T | C | 0.8065 | 0.022  | 0.0102 | 0.03 | Sleep duration<br>Unipolar depression |     |
| 4  | rs45510091 | A | G | 0.95 | 0.05  | 0.0049 | 7.74E-21 | A | G | 0.9486 | 0.033  | 0.0182 | 0.07 |                                       |     |
| 13 | rs4772087  | T | C | 0.37 | 0.02  | 0.0023 | 2.34E-20 | T | C | 0.3907 | -0.005 | 0.0081 | 0.53 |                                       |     |
| 12 | rs56314503 | T | G | 0.75 | -0.02 | 0.0025 | 1.28E-16 | T | G | 0.7671 | 0.014  | 0.0094 | 0.15 |                                       |     |
| 16 | rs56887639 | A | G | 0.73 | -0.02 | 0.0024 | 6.04E-13 | A | G | 0.7346 | -0.010 | 0.0088 | 0.27 |                                       |     |
| 11 | rs57344483 | A | G | 0.93 | -0.02 | 0.0041 | 5.26E-09 | A | G | 0.9214 | 0.025  | 0.0150 | 0.10 |                                       |     |
| 7  | rs58104186 | A | G | 0.47 | 0.02  | 0.0022 | 3.56E-18 | A | G | 0.4594 | 0.011  | 0.0079 | 0.18 |                                       |     |
| 11 | rs58621819 | A | T | 0.79 | -0.02 | 0.0027 | 2.17E-10 | A | T | 0.7958 | 0.004  | 0.0115 | 0.73 |                                       |     |
| 22 | rs5995992  | T | C | 0.72 | -0.03 | 0.0024 | 2.60E-35 | T | C | 0.7167 | 0.001  | 0.0088 | 0.88 |                                       |     |
| 5  | rs60157091 | T | C | 0.52 | 0.02  | 0.0022 | 5.54E-21 | T | C | 0.5121 | -0.005 | 0.0078 | 0.53 |                                       |     |
| 11 | rs61902811 | A | G | 0.37 | -0.03 | 0.0022 | 5.17E-39 | A | G | 0.3565 | -0.010 | 0.0082 | 0.22 |                                       |     |

|    |            |   |   |      |       |        |          |   |   |        |        |        |      |                                                                                                           |
|----|------------|---|---|------|-------|--------|----------|---|---|--------|--------|--------|------|-----------------------------------------------------------------------------------------------------------|
| 14 | rs61990288 | A | G | 0.51 | -0.02 | 0.0021 | 1.96E-31 | A | G | 0.4944 | -0.015 | 0.0078 | 0.05 | Unipolar depression                                                                                       |
| 18 | rs62091461 | T | C | 0.23 | -0.02 | 0.0026 | 1.75E-14 | T | C | 0.2461 | -0.006 | 0.0092 | 0.55 |                                                                                                           |
| 2  | rs62188629 | A | G | 0.31 | 0.02  | 0.0024 | 6.15E-13 | A | G | 0.3208 | -0.001 | 0.0086 | 0.89 |                                                                                                           |
| 8  | rs67436663 | C | G | 0.24 | -0.01 | 0.0025 | 2.83E-08 | C | G | 0.2335 | 0.002  | 0.0139 | 0.87 |                                                                                                           |
| 3  | rs6783233  | T | C | 0.28 | 0.02  | 0.0024 | 1.14E-13 | T | C | 0.2807 | 0.010  | 0.0087 | 0.25 |                                                                                                           |
| 9  | rs7030813  | T | C | 0.37 | 0.03  | 0.0022 | 8.88E-30 | T | C | 0.3901 | -0.007 | 0.0081 | 0.39 |                                                                                                           |
| 11 | rs7117514  | A | G | 0.54 | -0.02 | 0.0022 | 3.64E-14 | A | G | 0.5364 | 0.011  | 0.0080 | 0.18 |                                                                                                           |
| 16 | rs7193263  | A | G | 0.67 | -0.02 | 0.0023 | 3.83E-19 | A | G | 0.6653 | -0.001 | 0.0084 | 0.90 |                                                                                                           |
| 16 | rs7198928  | T | C | 0.62 | 0.02  | 0.0022 | 3.71E-23 | T | C | 0.6172 | -0.017 | 0.0094 | 0.06 |                                                                                                           |
| 16 | rs7200826  | T | C | 0.26 | 0.03  | 0.0025 | 3.09E-28 | T | C | 0.2716 | 0.016  | 0.0088 | 0.08 | Unipolar depression<br>Wellbeing measurement<br>Neuroticism measurement<br>Depressive symptom measurement |
| 18 | rs7227069  | A | G | 0.43 | 0.02  | 0.0022 | 2.13E-28 | A | G | 0.448  | 0.002  | 0.0078 | 0.84 |                                                                                                           |
| 18 | rs7241572  | A | G | 0.20 | 0.02  | 0.0027 | 2.56E-13 | A | G | 0.2046 | -0.009 | 0.0099 | 0.34 |                                                                                                           |
| 6  | rs725616   | T | C | 0.36 | 0.01  | 0.0022 | 1.06E-09 | T | C | 0.361  | 0.007  | 0.0081 | 0.42 |                                                                                                           |
| 1  | rs72710803 | A | C | 0.91 | -0.02 | 0.0038 | 1.35E-10 | A | C | 0.9195 | 0.004  | 0.0147 | 0.81 |                                                                                                           |
| 17 | rs75581564 | A | G | 0.12 | 0.02  | 0.0034 | 3.49E-13 | A | G | 0.1114 | -0.011 | 0.0126 | 0.40 |                                                                                                           |
| 2  | rs7585722  | T | C | 0.85 | -0.02 | 0.003  | 5.47E-13 | T | C | 0.8489 | 0.015  | 0.0110 | 0.17 |                                                                                                           |
| 4  | rs7685686  | A | G | 0.58 | 0.02  | 0.0022 | 5.52E-15 | A | G | 0.5703 | -0.001 | 0.0080 | 0.90 |                                                                                                           |
| 6  | rs7758630  | A | T | 0.41 | -0.02 | 0.0022 | 7.79E-14 | A | T | 0.3885 | -0.015 | 0.0081 | 0.06 |                                                                                                           |
| 7  | rs7807677  | T | C | 0.55 | 0.02  | 0.0022 | 5.40E-22 | T | C | 0.5754 | 0.004  | 0.0080 | 0.65 |                                                                                                           |
| 12 | rs78337797 | T | G | 0.88 | 0.02  | 0.0034 | 1.37E-11 | T | G | 0.8788 | 0.002  | 0.0123 | 0.90 |                                                                                                           |
| 8  | rs7837935  | T | G | 0.15 | -0.02 | 0.0031 | 1.15E-13 | T | G | 0.1462 | -0.009 | 0.0111 | 0.43 |                                                                                                           |

|    |           |   |   |      |       |        |          |   |   |        |           |        |      |
|----|-----------|---|---|------|-------|--------|----------|---|---|--------|-----------|--------|------|
| 11 | rs7932640 | T | C | 0.44 | 0.02  | 0.0022 | 3.40E-25 | T | C | 0.46   | -0.002    | 0.0080 | 0.83 |
| 15 | rs8037355 | T | C | 0.56 | -0.02 | 0.0022 | 1.52E-18 | T | C | 0.5454 | -0.005    | 0.0078 | 0.52 |
| 9  | rs913930  | A | G | 0.64 | -0.02 | 0.0023 | 1.03E-21 | A | G | 0.6335 | -0.008    | 0.0083 | 0.32 |
| 6  | rs9342504 | T | C | 0.60 | 0.02  | 0.0023 | 2.50E-12 | T | C | 0.6013 | -0.001    | 0.0080 | 0.88 |
| 13 | rs9545360 | A | C | 0.18 | -0.02 | 0.0029 | 6.70E-09 | A | C | 0.1798 | -8.00E-04 | 0.0118 | 0.95 |
| 9  | rs958538  | T | C | 0.76 | 0.02  | 0.0026 | 1.28E-15 | T | C | 0.7584 | 3.00E-04  | 0.0091 | 0.97 |
| 13 | rs9592461 | A | G | 0.49 | 0.02  | 0.0022 | 1.17E-28 | A | G | 0.4847 | 0.006     | 0.0079 | 0.49 |
| 10 | rs997934  | T | C | 0.38 | 0.02  | 0.0023 | 4.60E-13 | T | C | 0.3836 | 0.008     | 0.0081 | 0.31 |

Chr indicates chromosome; SNP, single nucleotide polymorphism; EA, effect allele; NEA, non-effect allele; EAF, effect allele frequency; SE, standard error.

<sup>a</sup> Beta presents natural logarithm of odds ratio.

\* Palindromic SNPs with minor allele frequency of >0.42 were considered to be strand-ambiguous and removed from final analysis.

# Six outlier SNPs were detected in leave-one-out analysis. Traits associated with those six SNPs were searched in GWAS catalog and presented here.

**ESM Table 5. Characteristics of the single-nucleotide polymorphisms associated with type 2 diabetes and their associations with major depressive disorder**

| Chr | SNP         | Type 2 diabetes |     |      |                   |       |          | Major depressive disorder |     |      |                   |       |          | Proxy <sup>#</sup> | R <sup>2</sup> | Ambiguous<br>Palindrome* |
|-----|-------------|-----------------|-----|------|-------------------|-------|----------|---------------------------|-----|------|-------------------|-------|----------|--------------------|----------------|--------------------------|
|     |             | EA              | NEA | EAF  | Beta <sup>a</sup> | SE    | P        | EA                        | NEA | EAF  | Beta <sup>a</sup> | SE    | P        |                    |                |                          |
| 15  | rs1005752   | A               | C   | 0.72 | 0.03              | 0.004 | 1.40E-21 | A                         | C   | 0.72 | -0.002            | 0.005 | 6.48E-01 |                    |                |                          |
| 8   | rs10096633  | C               | T   | 0.88 | 0.03              | 0.004 | 2.90E-09 | C                         | T   | 0.88 | 0.003             | 0.007 | 6.59E-01 |                    |                |                          |
| 8   | rs10097617  | T               | C   | 0.48 | 0.02              | 0.004 | 5.60E-12 | T                         | C   | 0.48 | -0.005            | 0.004 | 2.11E-01 |                    |                |                          |
| 2   | rs10193538  | T               | G   | 0.61 | 0.02              | 0.002 | 2.50E-09 | T                         | G   | 0.61 | -0.019            | 0.004 | 1.54E-05 |                    |                |                          |
| 2   | rs10195252  | T               | C   | 0.59 | 0.03              | 0.002 | 7.40E-18 | T                         | C   | 0.59 | -0.004            | 0.004 | 4.28E-01 |                    |                |                          |
| 7   | rs10228066  | T               | C   | 0.54 | 0.03              | 0.004 | 2.90E-21 | T                         | C   | 0.55 | -0.007            | 0.004 | 1.07E-01 |                    |                |                          |
| 19  | rs10406327  | C               | G   | 0.52 | 0.02              | 0.004 | 3.30E-09 | C                         | G   | 0.52 | 0.000             | 0.004 | 9.88E-01 |                    |                | Yes                      |
| 19  | rs10406431  | A               | G   | 0.56 | 0.03              | 0.004 | 8.20E-17 | A                         | G   | 0.56 | 0.008             | 0.004 | 7.81E-02 |                    |                |                          |
| 12  | rs1042725   | T               | C   | 0.49 | 0.03              | 0.002 | 8.00E-15 | T                         | C   | 0.49 | 0.013             | 0.004 | 3.06E-03 |                    |                |                          |
| 17  | rs1043246   | G               | C   | 0.16 | 0.03              | 0.004 | 7.90E-12 | G                         | C   | 0.16 | -0.005            | 0.006 | 4.68E-01 |                    |                |                          |
| 11  | rs1061810   | A               | C   | 0.29 | 0.02              | 0.002 | 3.90E-09 | A                         | C   | 0.29 | -0.005            | 0.005 | 3.36E-01 |                    |                |                          |
| 11  | rs10750397  | A               | G   | 0.28 | 0.02              | 0.002 | 1.90E-08 | A                         | G   | 0.28 | 0.004             | 0.005 | 4.29E-01 |                    |                |                          |
| 9   | rs10811660  | G               | A   | 0.83 | 0.07              | 0.004 | 2.20E-61 | G                         | A   | 0.83 | -0.002            | 0.006 | 7.15E-01 |                    |                |                          |
| 11  | rs10830963  | G               | C   | 0.28 | 0.05              | 0.004 | 1.70E-40 | G                         | C   | 0.27 | 0.010             | 0.005 | 4.96E-02 |                    |                |                          |
| 12  | rs10842994  | C               | T   | 0.81 | 0.03              | 0.004 | 2.50E-17 | C                         | T   | 0.80 | 0.009             | 0.005 | 1.06E-01 |                    |                |                          |
| 10  | rs10882101  | T               | C   | 0.59 | 0.05              | 0.002 | 5.60E-50 | T                         | C   | 0.59 | -0.004            | 0.004 | 4.08E-01 |                    |                |                          |
| 11  | rs10893829  | T               | C   | 0.85 | 0.03              | 0.004 | 5.10E-09 | T                         | C   | 0.86 | -0.003            | 0.006 | 6.33E-01 |                    |                |                          |
| 17  | rs10908278  | T               | A   | 0.48 | 0.03              | 0.004 | 1.30E-25 | T                         | A   | 0.48 | -0.002            | 0.004 | 6.13E-01 |                    |                | Yes                      |
| 4   | rs10937721  | C               | G   | 0.59 | 0.04              | 0.004 | 1.30E-33 | C                         | G   | 0.59 | 0.009             | 0.005 | 5.62E-02 |                    |                |                          |
| 17  | rs10962     | C               | G   | 0.23 | 0.02              | 0.004 | 4.40E-08 | C                         | G   | 0.22 | 0.003             | 0.005 | 5.59E-01 |                    |                |                          |
| 9   | rs10974438  | C               | A   | 0.36 | 0.03              | 0.002 | 1.70E-13 | C                         | A   | 0.35 | 0.000             | 0.005 | 9.68E-01 |                    |                |                          |
| 15  | rs11070332  | A               | G   | 0.36 | 0.02              | 0.004 | 9.40E-12 | A                         | G   | 0.35 | 0.009             | 0.005 | 4.67E-02 |                    |                |                          |
| 10  | rs1112718   | A               | G   | 0.60 | 0.05              | 0.004 | 2.70E-47 | A                         | G   | 0.60 | -0.001            | 0.004 | 7.72E-01 |                    |                |                          |
| 10  | rs11202627  | T               | C   | 0.15 | 0.03              | 0.004 | 2.00E-08 | T                         | C   | 0.16 | -0.005            | 0.006 | 3.91E-01 |                    |                |                          |
| 6   | rs112498319 | C               | A   | 0.41 | 0.02              | 0.002 | 3.90E-10 | C                         | A   | 0.41 | 0.007             | 0.004 | 1.31E-01 |                    |                |                          |



|    |             |   |   |      |      |       |          |   |   |      |        |       |          |
|----|-------------|---|---|------|------|-------|----------|---|---|------|--------|-------|----------|
| 10 | rs11257655  | T | C | 0.22 | 0.04 | 0.004 | 3.80E-24 | T | C | 0.21 | 0.002  | 0.006 | 6.94E-01 |
| 1  | rs1127215   | C | T | 0.58 | 0.02 | 0.002 | 5.10E-10 | C | T | 0.58 | 0.002  | 0.004 | 6.18E-01 |
| 5  | rs115505614 | T | C | 0.05 | 0.08 | 0.009 | 1.10E-24 | T | C | 0.05 | -0.017 | 0.010 | 8.85E-02 |
| 2  | rs11688931  | C | G | 0.85 | 0.03 | 0.004 | 2.20E-09 | C | G | 0.85 | 0.000  | 0.006 | 9.83E-01 |
| 20 | rs11699802  | C | T | 0.54 | 0.02 | 0.004 | 1.70E-12 | C | T | 0.53 | 0.000  | 0.004 | 9.20E-01 |
| 22 | rs117001013 | C | T | 0.91 | 0.03 | 0.006 | 4.80E-08 | C | T | 0.92 | 0.007  | 0.008 | 3.67E-01 |
| 3  | rs11708067  | A | G | 0.77 | 0.04 | 0.004 | 9.30E-28 | A | G | 0.76 | -0.002 | 0.005 | 6.93E-01 |
| 3  | rs11709077  | G | A | 0.88 | 0.04 | 0.004 | 9.00E-18 | G | A | 0.88 | -0.006 | 0.007 | 3.45E-01 |
| 6  | rs11759026  | G | A | 0.23 | 0.03 | 0.004 | 6.10E-14 | G | A | 0.23 | -0.006 | 0.005 | 2.78E-01 |
| 11 | rs11820019  | T | C | 0.97 | 0.06 | 0.009 | 9.10E-09 | T | C | 0.97 | -0.008 | 0.014 | 5.38E-01 |
| 3  | rs11926707  | C | T | 0.63 | 0.02 | 0.004 | 4.40E-08 | C | T | 0.63 | 0.000  | 0.005 | 9.61E-01 |
| 6  | rs11967262  | G | C | 0.49 | 0.02 | 0.004 | 3.50E-09 | G | C | 0.49 | 0.003  | 0.004 | 4.66E-01 |
| 9  | rs12001437  | C | T | 0.37 | 0.02 | 0.004 | 2.50E-08 | C | T | 0.37 | -0.009 | 0.005 | 4.24E-02 |
| 1  | rs12140153  | G | T | 0.91 | 0.03 | 0.004 | 1.20E-08 | G | T | 0.91 | 0.000  | 0.008 | 9.74E-01 |
| 18 | rs12454712  | T | C | 0.61 | 0.03 | 0.002 | 4.70E-13 | T | C | 0.62 | -0.004 | 0.005 | 4.45E-01 |
| 2  | rs1260326   | C | T | 0.61 | 0.03 | 0.002 | 9.60E-25 | C | T | 0.60 | -0.004 | 0.004 | 3.69E-01 |
| 12 | rs12811407  | A | G | 0.33 | 0.02 | 0.004 | 2.40E-10 | A | G | 0.32 | -0.004 | 0.005 | 3.74E-01 |
| 15 | rs12910825  | G | A | 0.36 | 0.03 | 0.004 | 8.10E-16 | G | A | 0.36 | 0.008  | 0.005 | 7.37E-02 |
| 3  | rs13085136  | C | T | 0.93 | 0.04 | 0.006 | 2.50E-09 | C | T | 0.93 | -0.002 | 0.009 | 8.62E-01 |
| 5  | rs1316776   | C | A | 0.65 | 0.02 | 0.002 | 3.80E-09 | C | A | 0.65 | 0.010  | 0.005 | 2.43E-02 |
| 8  | rs13262861  | C | A | 0.83 | 0.05 | 0.004 | 3.20E-27 | C | A | 0.82 | 0.003  | 0.006 | 5.84E-01 |
| 13 | rs1359790   | G | A | 0.72 | 0.04 | 0.002 | 3.80E-25 | G | A | 0.71 | 0.001  | 0.005 | 9.10E-01 |
| 15 | rs13737     | G | T | 0.76 | 0.02 | 0.004 | 5.20E-10 | G | T | 0.75 | 0.007  | 0.005 | 1.89E-01 |
| 17 | rs1377807   | C | G | 0.31 | 0.03 | 0.004 | 1.70E-13 | C | G | 0.31 | -0.007 | 0.005 | 1.22E-01 |
| 9  | rs1412234   | C | T | 0.32 | 0.02 | 0.002 | 3.40E-09 | C | T | 0.32 | -0.005 | 0.005 | 2.98E-01 |
| 9  | rs1412830   | C | T | 0.63 | 0.02 | 0.004 | 8.80E-11 | C | T | 0.63 | 0.002  | 0.005 | 7.19E-01 |
| 16 | rs1421085   | C | T | 0.42 | 0.05 | 0.004 | 1.10E-60 | C | T | 0.41 | 0.010  | 0.004 | 2.01E-02 |
| 12 | rs1426371   | G | A | 0.74 | 0.03 | 0.002 | 3.30E-11 | G | A | 0.74 | -0.004 | 0.005 | 4.71E-01 |
| 11 | rs145678014 | G | T | 0.96 | 0.05 | 0.008 | 1.60E-08 | G | T | 0.96 | 0.045  | 0.011 | 2.34E-05 |
| 5  | rs146886108 | C | T | 0.99 | 0.17 | 0.023 | 6.70E-14 | C | T | 0.99 | 0.017  | 0.028 | 5.59E-01 |

Yes

|    |             |   |   |      |      |       |          |   |   |      |        |       |          |
|----|-------------|---|---|------|------|-------|----------|---|---|------|--------|-------|----------|
| 8  | rs148766658 | C | T | 0.04 | 0.05 | 0.010 | 3.20E-10 | C | T | 0.04 | 0.017  | 0.012 | 1.42E-01 |
| 8  | rs149364428 | A | G | 0.01 | 0.12 | 0.018 | 1.20E-11 | A | G | 0.01 | -0.017 | 0.025 | 4.98E-01 |
| 1  | rs1493694   | T | C | 0.11 | 0.04 | 0.006 | 8.00E-14 | T | C | 0.11 | 0.007  | 0.007 | 3.41E-01 |
| 4  | rs1531583   | T | G | 0.05 | 0.05 | 0.008 | 1.10E-10 | T | G | 0.04 | -0.002 | 0.011 | 8.81E-01 |
| 7  | rs1562396   | G | A | 0.32 | 0.03 | 0.004 | 8.10E-14 | G | A | 0.32 | 0.002  | 0.005 | 7.34E-01 |
| 4  | rs1580278   | C | A | 0.47 | 0.02 | 0.004 | 1.90E-08 | C | A | 0.47 | 0.000  | 0.004 | 9.29E-01 |
| 3  | rs17013314  | G | A | 0.03 | 0.05 | 0.010 | 1.00E-08 | G | A | 0.03 | -0.011 | 0.013 | 4.09E-01 |
| 7  | rs1708302   | C | T | 0.51 | 0.04 | 0.002 | 6.40E-31 | C | T | 0.50 | 0.003  | 0.004 | 5.07E-01 |
| 7  | rs17168486  | T | C | 0.18 | 0.03 | 0.004 | 3.10E-14 | T | C | 0.18 | 0.002  | 0.006 | 7.51E-01 |
| 5  | rs17250977  | G | A | 0.04 | 0.06 | 0.009 | 1.20E-12 | G | A | 0.04 | -0.011 | 0.012 | 3.29E-01 |
| 8  | rs17689007  | G | A | 0.53 | 0.02 | 0.004 | 2.50E-11 | G | A | 0.53 | -0.006 | 0.005 | 1.74E-01 |
| 10 | rs177045    | G | A | 0.32 | 0.02 | 0.004 | 2.20E-10 | G | A | 0.32 | 0.000  | 0.005 | 9.26E-01 |
| 9  | rs17791513  | A | G | 0.93 | 0.05 | 0.006 | 3.00E-12 | A | G | 0.94 | 0.006  | 0.009 | 5.19E-01 |
| 3  | rs17819328  | G | T | 0.42 | 0.02 | 0.004 | 2.60E-08 | G | T | 0.42 | 0.001  | 0.004 | 8.10E-01 |
| 11 | rs1783541   | T | C | 0.20 | 0.03 | 0.004 | 5.20E-12 | T | C | 0.21 | 0.027  | 0.005 | 3.37E-07 |
| 14 | rs17836088  | C | G | 0.22 | 0.03 | 0.002 | 6.90E-13 | C | G | 0.22 | 0.005  | 0.005 | 3.57E-01 |
| 12 | rs1796330   | G | C | 0.57 | 0.02 | 0.004 | 2.50E-11 | G | C | 0.56 | -0.006 | 0.004 | 1.41E-01 |
| 12 | rs1800574   | T | C | 0.03 | 0.06 | 0.009 | 3.50E-11 | T | C | 0.03 | -0.028 | 0.013 | 3.28E-02 |
| 20 | rs1800961   | T | C | 0.04 | 0.07 | 0.009 | 1.10E-16 | T | C | 0.03 | 0.004  | 0.012 | 7.56E-01 |
| 4  | rs1801212   | A | G | 0.71 | 0.04 | 0.004 | 1.30E-34 | A | G | 0.72 | 0.006  | 0.005 | 2.00E-01 |
| 22 | rs1801645   | C | T | 0.28 | 0.03 | 0.002 | 1.20E-10 | C | T | 0.26 | 0.011  | 0.005 | 3.01E-02 |
| 10 | rs180988137 | G | A | 0.01 | 0.14 | 0.017 | 2.40E-16 | G | A | 0.01 | -0.012 | 0.023 | 5.92E-01 |
| 10 | rs184509201 | C | G | 0.98 | 0.08 | 0.013 | 3.10E-11 | C | G | 0.98 | -0.001 | 0.017 | 9.73E-01 |
| 2  | rs2028150   | C | G | 0.60 | 0.02 | 0.004 | 5.10E-11 | C | G | 0.59 | 0.007  | 0.004 | 9.05E-02 |
| 12 | rs2197973   | T | C | 0.54 | 0.02 | 0.004 | 9.50E-09 | T | C | 0.54 | 0.003  | 0.004 | 4.44E-01 |
| 11 | rs2237895   | C | A | 0.43 | 0.05 | 0.002 | 3.60E-42 | C | A | 0.42 | 0.002  | 0.005 | 7.34E-01 |
| 19 | rs2238689   | C | T | 0.42 | 0.03 | 0.002 | 8.70E-15 | C | T | 0.41 | 0.002  | 0.004 | 6.36E-01 |
| 2  | rs2249105   | A | G | 0.63 | 0.02 | 0.004 | 1.40E-11 | A | G | 0.63 | 0.002  | 0.005 | 7.14E-01 |
| 12 | rs2258238   | T | A | 0.10 | 0.05 | 0.004 | 3.30E-23 | T | A | 0.11 | 0.000  | 0.007 | 9.74E-01 |
| 10 | rs2280141   | T | G | 0.52 | 0.02 | 0.004 | 2.70E-08 | T | G | 0.53 | 0.000  | 0.004 | 9.69E-01 |

Yes

---

|    |            |   |   |      |      |       |          |   |   |      |        |       |          |
|----|------------|---|---|------|------|-------|----------|---|---|------|--------|-------|----------|
| 11 | rs2283220  | A | G | 0.69 | 0.02 | 0.004 | 1.40E-09 | A | G | 0.69 | -0.001 | 0.005 | 9.13E-01 |
| 5  | rs2307111  | T | C | 0.61 | 0.02 | 0.004 | 6.50E-13 | T | C | 0.61 | 0.002  | 0.004 | 6.33E-01 |
| 11 | rs231361   | A | G | 0.26 | 0.03 | 0.004 | 2.40E-15 | A | G | 0.26 | 0.000  | 0.005 | 9.96E-01 |
| 2  | rs243024   | A | G | 0.46 | 0.03 | 0.002 | 7.20E-15 | A | G | 0.45 | 0.005  | 0.004 | 2.59E-01 |
| 15 | rs2456530  | T | C | 0.13 | 0.03 | 0.004 | 1.30E-09 | T | C | 0.13 | 0.002  | 0.006 | 8.19E-01 |
| 10 | rs2642588  | G | T | 0.70 | 0.02 | 0.004 | 2.30E-09 | G | T | 0.70 | 0.001  | 0.005 | 8.36E-01 |
| 9  | rs2796441  | G | A | 0.59 | 0.03 | 0.004 | 4.60E-21 | G | A | 0.58 | 0.002  | 0.004 | 6.96E-01 |
| 6  | rs2800733  | A | G | 0.72 | 0.03 | 0.002 | 4.30E-12 | A | G | 0.71 | 0.003  | 0.005 | 5.38E-01 |
| 1  | rs2820446  | C | G | 0.71 | 0.02 | 0.004 | 2.70E-10 | C | G | 0.70 | -0.003 | 0.005 | 5.48E-01 |
| 9  | rs28505901 | G | A | 0.75 | 0.03 | 0.004 | 7.20E-19 | G | A | 0.76 | -0.004 | 0.005 | 3.97E-01 |
| 1  | rs291367   | G | A | 0.63 | 0.02 | 0.004 | 3.40E-08 | G | A | 0.63 | -0.001 | 0.005 | 8.08E-01 |
| 16 | rs2925979  | T | C | 0.30 | 0.02 | 0.004 | 3.90E-08 | T | C | 0.30 | 0.000  | 0.005 | 9.47E-01 |
| 2  | rs2972144  | G | A | 0.64 | 0.04 | 0.004 | 3.70E-37 | G | A | 0.64 | -0.001 | 0.005 | 9.05E-01 |
| 19 | rs3111316  | A | G | 0.59 | 0.02 | 0.004 | 1.60E-12 | A | G | 0.59 | -0.005 | 0.004 | 2.72E-01 |
| 12 | rs3217792  | C | T | 0.91 | 0.05 | 0.006 | 9.40E-20 | C | T | 0.91 | 0.001  | 0.008 | 9.02E-01 |
| 12 | rs3217860  | G | A | 0.26 | 0.03 | 0.002 | 6.10E-11 | G | A | 0.25 | 0.000  | 0.005 | 9.45E-01 |
| 5  | rs329122   | A | G | 0.43 | 0.02 | 0.004 | 3.30E-08 | A | G | 0.42 | -0.012 | 0.004 | 4.34E-03 |
| 1  | rs340874   | C | T | 0.56 | 0.03 | 0.004 | 3.80E-21 | C | T | 0.56 | -0.014 | 0.004 | 1.43E-03 |
| 15 | rs34715063 | C | T | 0.12 | 0.04 | 0.004 | 6.30E-13 | C | T | 0.13 | -0.005 | 0.007 | 4.32E-01 |
| 1  | rs348330   | G | A | 0.36 | 0.02 | 0.004 | 8.40E-11 | G | A | 0.37 | 0.008  | 0.005 | 6.65E-02 |
| 17 | rs34855406 | C | G | 0.28 | 0.02 | 0.004 | 1.00E-09 | C | G | 0.28 | 0.001  | 0.005 | 8.87E-01 |
| 3  | rs35352848 | T | C | 0.79 | 0.04 | 0.004 | 2.90E-20 | T | C | 0.80 | -0.005 | 0.005 | 3.41E-01 |
| 17 | rs35895680 | C | A | 0.68 | 0.03 | 0.002 | 5.70E-12 | C | A | 0.67 | -0.001 | 0.005 | 9.07E-01 |
| 2  | rs35913461 | C | T | 0.83 | 0.03 | 0.004 | 3.70E-09 | C | T | 0.83 | 0.005  | 0.006 | 3.98E-01 |
| 1  | rs3768321  | T | G | 0.20 | 0.04 | 0.004 | 3.30E-20 | T | G | 0.20 | 0.005  | 0.005 | 3.89E-01 |
| 3  | rs3774723  | G | A | 0.84 | 0.03 | 0.004 | 1.10E-10 | G | A | 0.85 | 0.009  | 0.006 | 1.29E-01 |
| 6  | rs3798519  | C | A | 0.18 | 0.03 | 0.004 | 4.70E-12 | C | A | 0.18 | 0.005  | 0.006 | 3.76E-01 |
| 8  | rs3802177  | G | A | 0.69 | 0.05 | 0.004 | 3.10E-45 | G | A | 0.69 | 0.002  | 0.005 | 6.49E-01 |
| 19 | rs3810291  | A | G | 0.67 | 0.03 | 0.002 | 5.80E-12 | A | G | 0.67 | 0.007  | 0.005 | 1.58E-01 |
| 3  | rs3887925  | T | C | 0.55 | 0.03 | 0.002 | 2.10E-14 | T | C | 0.55 | -0.013 | 0.004 | 3.38E-03 |

---

|    |            |   |   |      |      |       |          |   |   |      |        |       |          |
|----|------------|---|---|------|------|-------|----------|---|---|------|--------|-------|----------|
| 10 | rs41277236 | T | C | 0.04 | 0.05 | 0.010 | 2.10E-09 | T | C | 0.04 | 0.009  | 0.011 | 4.31E-01 |
| 12 | rs4148856  | C | G | 0.78 | 0.02 | 0.004 | 1.40E-08 | C | G | 0.79 | 0.014  | 0.005 | 6.99E-03 |
| 12 | rs4238013  | C | T | 0.21 | 0.03 | 0.004 | 1.20E-10 | C | T | 0.20 | 0.004  | 0.005 | 4.45E-01 |
| 7  | rs4279506  | G | C | 0.61 | 0.02 | 0.004 | 1.50E-08 | G | C | 0.62 | 0.002  | 0.005 | 7.13E-01 |
| 19 | rs429358   | T | C | 0.85 | 0.03 | 0.004 | 2.40E-10 | T | C | 0.85 | 0.001  | 0.006 | 9.41E-01 |
| 5  | rs4457053  | G | A | 0.30 | 0.03 | 0.004 | 5.00E-14 | G | A | 0.32 | 0.001  | 0.005 | 8.19E-01 |
| 5  | rs465002   | T | C | 0.74 | 0.03 | 0.004 | 6.00E-20 | T | C | 0.75 | -0.003 | 0.005 | 5.56E-01 |
| 3  | rs4686471  | C | T | 0.61 | 0.03 | 0.004 | 1.10E-19 | C | T | 0.61 | 0.000  | 0.004 | 9.60E-01 |
| 3  | rs4688760  | T | C | 0.68 | 0.02 | 0.002 | 3.70E-09 | T | C | 0.69 | 0.011  | 0.005 | 2.24E-02 |
| 6  | rs4709746  | C | T | 0.87 | 0.03 | 0.004 | 8.70E-09 | C | T | 0.87 | 0.001  | 0.006 | 8.71E-01 |
| 8  | rs4736819  | T | C | 0.55 | 0.03 | 0.002 | 1.10E-24 | T | C | 0.55 | 0.000  | 0.004 | 9.52E-01 |
| 6  | rs474513   | A | G | 0.52 | 0.02 | 0.004 | 8.10E-09 | A | G | 0.52 | -0.004 | 0.004 | 3.30E-01 |
| 19 | rs4804833  | A | G | 0.39 | 0.03 | 0.002 | 3.30E-13 | A | G | 0.38 | 0.006  | 0.005 | 1.53E-01 |
| 20 | rs4810426  | T | C | 0.11 | 0.04 | 0.004 | 1.00E-14 | T | C | 0.10 | 0.000  | 0.007 | 9.71E-01 |
| 17 | rs4925109  | A | G | 0.32 | 0.02 | 0.004 | 3.50E-08 | A | G | 0.31 | -0.008 | 0.005 | 7.88E-02 |
| 11 | rs4929965  | A | G | 0.38 | 0.03 | 0.002 | 2.00E-23 | A | G | 0.38 | -0.002 | 0.005 | 6.17E-01 |
| 15 | rs4932265  | T | C | 0.27 | 0.03 | 0.004 | 6.60E-17 | T | C | 0.26 | 0.004  | 0.005 | 4.60E-01 |
| 8  | rs4977213  | C | T | 0.37 | 0.02 | 0.004 | 6.60E-12 | C | T | 0.38 | -0.008 | 0.005 | 9.07E-02 |
| 11 | rs5213     | C | T | 0.36 | 0.03 | 0.002 | 6.80E-18 | C | T | 0.35 | -0.006 | 0.005 | 2.20E-01 |
| 18 | rs523288   | T | A | 0.24 | 0.03 | 0.004 | 1.70E-12 | T | A | 0.24 | -0.015 | 0.005 | 2.58E-03 |
| 1  | rs539515   | C | A | 0.20 | 0.03 | 0.004 | 2.60E-10 | C | A | 0.20 | 0.001  | 0.005 | 8.14E-01 |
| 9  | rs55653563 | A | C | 0.73 | 0.02 | 0.002 | 3.20E-08 | A | C | 0.73 | -0.002 | 0.005 | 6.29E-01 |
| 4  | rs56337234 | C | T | 0.50 | 0.03 | 0.004 | 1.20E-15 | C | T | 0.51 | -0.001 | 0.005 | 7.68E-01 |
| 12 | rs56348580 | G | C | 0.69 | 0.03 | 0.002 | 6.50E-13 | G | C | 0.69 | 0.003  | 0.005 | 5.59E-01 |
| 11 | rs57235767 | C | T | 0.71 | 0.02 | 0.004 | 2.90E-09 | C | T | 0.71 | -0.004 | 0.005 | 4.21E-01 |
| 1  | rs58432198 | C | T | 0.88 | 0.03 | 0.004 | 3.90E-08 | C | T | 0.88 | 0.010  | 0.007 | 1.38E-01 |
| 4  | rs58730668 | T | C | 0.86 | 0.03 | 0.004 | 4.20E-10 | T | C | 0.86 | 0.008  | 0.006 | 2.28E-01 |
| 6  | rs601945   | G | A | 0.18 | 0.03 | 0.004 | 1.40E-15 | G | A | 0.19 | -0.001 | 0.006 | 8.96E-01 |
| 20 | rs6063048  | G | A | 0.72 | 0.02 | 0.002 | 1.10E-08 | G | A | 0.72 | 0.002  | 0.005 | 6.45E-01 |
| 20 | rs6070625  | G | C | 0.52 | 0.02 | 0.004 | 5.10E-12 | G | C | 0.51 | -0.005 | 0.004 | 2.56E-01 |

Yes

|    |            |   |   |      |      |       |          |   |   |      |        |       |          |
|----|------------|---|---|------|------|-------|----------|---|---|------|--------|-------|----------|
| 17 | rs61676547 | C | G | 0.19 | 0.02 | 0.004 | 4.00E-08 | C | G | 0.19 | 0.011  | 0.006 | 4.62E-02 |
| 2  | rs62107261 | T | C | 0.95 | 0.05 | 0.010 | 3.60E-09 | T | C | 0.95 | 0.001  | 0.010 | 8.94E-01 |
| 7  | rs62492368 | A | G | 0.31 | 0.02 | 0.004 | 2.40E-10 | A | G | 0.31 | 0.004  | 0.005 | 4.54E-01 |
| 6  | rs6458354  | C | T | 0.29 | 0.02 | 0.004 | 3.40E-09 | C | T | 0.29 | 0.001  | 0.005 | 7.80E-01 |
| 7  | rs6459733  | G | C | 0.67 | 0.03 | 0.002 | 7.10E-17 | G | C | 0.66 | 0.001  | 0.005 | 8.61E-01 |
| 22 | rs6518681  | G | A | 0.91 | 0.04 | 0.006 | 1.70E-10 | G | A | 0.91 | -0.004 | 0.008 | 6.16E-01 |
| 16 | rs6600191  | T | C | 0.82 | 0.03 | 0.004 | 1.60E-12 | T | C | 0.82 | 0.004  | 0.006 | 4.43E-01 |
| 2  | rs6708643  | A | G | 0.50 | 0.02 | 0.004 | 2.10E-08 | A | G | 0.51 | 0.004  | 0.004 | 4.15E-01 |
| 11 | rs67232546 | T | C | 0.21 | 0.03 | 0.004 | 3.00E-10 | T | C | 0.21 | 0.004  | 0.005 | 4.14E-01 |
| 3  | rs6780171  | A | T | 0.31 | 0.05 | 0.002 | 4.40E-45 | A | T | 0.31 | 0.002  | 0.005 | 7.34E-01 |
| 5  | rs6885132  | C | G | 0.90 | 0.04 | 0.006 | 1.60E-12 | C | G | 0.90 | 0.003  | 0.007 | 6.52E-01 |
| 9  | rs7022807  | G | A | 0.40 | 0.02 | 0.004 | 4.90E-09 | G | A | 0.40 | 0.000  | 0.004 | 9.93E-01 |
| 5  | rs702634   | A | G | 0.69 | 0.02 | 0.004 | 1.10E-09 | A | G | 0.69 | -0.005 | 0.005 | 3.07E-01 |
| 10 | rs703972   | G | C | 0.53 | 0.03 | 0.002 | 1.90E-24 | G | C | 0.54 | -0.006 | 0.004 | 2.08E-01 |
| 10 | rs7078559  | T | C | 0.58 | 0.02 | 0.002 | 1.80E-10 | T | C | 0.59 | 0.007  | 0.004 | 9.25E-02 |
| 11 | rs7115753  | A | G | 0.45 | 0.02 | 0.004 | 2.60E-08 | A | G | 0.44 | 0.002  | 0.004 | 5.86E-01 |
| 15 | rs7178762  | C | T | 0.46 | 0.02 | 0.004 | 6.90E-09 | C | T | 0.45 | 0.008  | 0.004 | 6.63E-02 |
| 12 | rs718314   | G | A | 0.25 | 0.02 | 0.004 | 3.50E-10 | G | A | 0.24 | 0.002  | 0.005 | 6.32E-01 |
| 17 | rs7222481  | C | G | 0.32 | 0.02 | 0.002 | 1.50E-08 | C | G | 0.33 | 0.001  | 0.005 | 8.52E-01 |
| 10 | rs72631105 | A | G | 0.19 | 0.02 | 0.004 | 3.10E-08 | A | G | 0.19 | 0.004  | 0.006 | 4.30E-01 |
| 16 | rs72802342 | C | A | 0.92 | 0.06 | 0.008 | 5.10E-25 | C | A | 0.92 | -0.005 | 0.008 | 5.30E-01 |
| 12 | rs73226260 | G | A | 0.97 | 0.05 | 0.010 | 1.60E-08 | G | A | 0.97 | 0.009  | 0.012 | 4.83E-01 |
| 22 | rs738408   | T | C | 0.23 | 0.02 | 0.004 | 1.70E-09 | T | C | 0.22 | -0.001 | 0.005 | 8.84E-01 |
| 3  | rs74653713 | C | A | 0.96 | 0.05 | 0.010 | 1.50E-09 | C | A | 0.96 | -0.007 | 0.011 | 5.47E-01 |
| 9  | rs76011118 | A | G | 0.03 | 0.09 | 0.009 | 6.80E-18 | A | G | 0.03 | 0.007  | 0.014 | 6.25E-01 |
| 4  | rs7669833  | T | A | 0.70 | 0.02 | 0.004 | 5.80E-11 | T | A | 0.71 | 0.000  | 0.005 | 9.97E-01 |
| 12 | rs76895963 | T | G | 0.98 | 0.20 | 0.014 | 4.80E-53 | T | G | 0.98 | 0.006  | 0.017 | 7.41E-01 |
| 11 | rs77464186 | A | C | 0.84 | 0.05 | 0.004 | 7.60E-27 | A | C | 0.84 | -0.013 | 0.006 | 3.05E-02 |
| 6  | rs7756992  | G | A | 0.27 | 0.06 | 0.002 | 1.00E-64 | G | A | 0.27 | 0.000  | 0.005 | 9.51E-01 |
| 10 | rs78025551 | C | G | 0.85 | 0.07 | 0.006 | 9.90E-54 | C | G | 0.86 | -0.016 | 0.006 | 1.07E-02 |

Yes

|    |             |      |      |      |      |       |           |    |    |      |        |       |          |                 |
|----|-------------|------|------|------|------|-------|-----------|----|----|------|--------|-------|----------|-----------------|
| 10 | rs7903146   | T    | C    | 0.30 | 0.14 | 0.005 | 1.00E-200 | T  | C  | 0.29 | -0.012 | 0.005 | 1.17E-02 |                 |
| 1  | rs79687284  | C    | G    | 0.03 | 0.08 | 0.009 | 4.30E-19  | C  | G  | 0.03 | -0.011 | 0.012 | 3.68E-01 |                 |
| 2  | rs80147536  | A    | T    | 0.90 | 0.06 | 0.006 | 3.80E-25  | A  | T  | 0.90 | -0.012 | 0.007 | 1.02E-01 |                 |
| 15 | rs8032939   | C    | T    | 0.25 | 0.02 | 0.002 | 3.60E-08  | C  | T  | 0.25 | 0.018  | 0.005 | 3.12E-04 |                 |
| 15 | rs8037894   | G    | C    | 0.57 | 0.02 | 0.002 | 1.70E-09  | G  | C  | 0.57 | -0.001 | 0.004 | 8.53E-01 | Yes             |
| 19 | rs8107974   | T    | A    | 0.08 | 0.05 | 0.006 | 8.70E-15  | T  | A  | 0.08 | -0.017 | 0.008 | 4.12E-02 |                 |
| 16 | rs862320    | C    | T    | 0.58 | 0.02 | 0.004 | 1.30E-12  | C  | T  | 0.59 | 0.010  | 0.004 | 1.70E-02 |                 |
| 7  | rs878521    | A    | G    | 0.25 | 0.03 | 0.004 | 2.80E-11  | A  | G  | 0.25 | 0.006  | 0.005 | 2.38E-01 |                 |
| 6  | rs9379084   | G    | A    | 0.89 | 0.05 | 0.004 | 5.60E-20  | G  | A  | 0.88 | 0.006  | 0.007 | 3.90E-01 |                 |
| 13 | rs9563615   | A    | T    | 0.71 | 0.02 | 0.004 | 9.80E-10  | A  | T  | 0.71 | -0.005 | 0.005 | 3.20E-01 |                 |
| 13 | rs9569864   | C    | T    | 0.82 | 0.03 | 0.004 | 9.70E-10  | C  | T  | 0.83 | -0.002 | 0.006 | 7.97E-01 |                 |
| 5  | rs96844     | G    | A    | 0.26 | 0.02 | 0.002 | 2.80E-08  | G  | A  | 0.25 | -0.001 | 0.005 | 8.17E-01 |                 |
| 5  | rs9687832   | A    | G    | 0.20 | 0.03 | 0.004 | 2.20E-12  | A  | G  | 0.20 | 0.004  | 0.005 | 4.45E-01 |                 |
| 3  | rs9860730   | A    | G    | 0.70 | 0.03 | 0.002 | 1.00E-11  | A  | G  | 0.70 | 0.001  | 0.005 | 8.58E-01 |                 |
| 3  | rs9873618   | G    | A    | 0.71 | 0.03 | 0.002 | 1.20E-15  | G  | A  | 0.71 | -0.009 | 0.005 | 5.64E-02 |                 |
| 18 | rs72926932  | C(T) | A(C) | 0.08 | 0.04 | 0.004 | 2.30E-10  | T  | C  | 0.08 | -0.013 | 0.008 | 1.10E-01 | rs72926954 0.97 |
| 2  | rs11688682  | G    | C    | 0.73 | 0.03 | 0.004 | 5.40E-12  | NA | NA | NA   | NA     | NA    | NA       | <0.90           |
| 4  | rs12642790  | A    | G    | 0.34 | 0.02 | 0.002 | 2.50E-09  | NA | NA | NA   | NA     | NA    | NA       |                 |
| 5  | rs138337556 | G    | A    | 0.00 | 0.22 | 0.033 | 4.30E-11  | NA | NA | NA   | NA     | NA    | NA       | <0.90           |
| 5  | rs78408340  | G    | C    | 0.01 | 0.17 | 0.019 | 5.30E-18  | NA | NA | NA   | NA     | NA    | NA       | <0.90           |
| 8  | rs11786992  | A    | C    | 0.64 | 0.02 | 0.004 | 3.80E-08  | NA | NA | NA   | NA     | NA    | NA       | <0.90           |
| 10 | rs536643418 | G    | C    | 0.01 | 0.22 | 0.040 | 3.80E-08  | NA | NA | NA   | NA     | NA    | NA       |                 |
| 11 | rs571342427 | C    | T    | 0.00 | 0.27 | 0.048 | 1.70E-08  | NA | NA | NA   | NA     | NA    | NA       |                 |
| 11 | rs2237897   | C    | T    | 0.95 | 0.09 | 0.007 | 1.30E-28  | NA | NA | NA   | NA     | NA    | NA       |                 |
| 11 | rs67254669  | G    | A    | 0.00 | 0.29 | 0.051 | 3.20E-08  | NA | NA | NA   | NA     | NA    | NA       | <0.90           |
| 16 | rs199795270 | C    | G    | 0.01 | 0.12 | 0.019 | 2.60E-08  | NA | NA | NA   | NA     | NA    | NA       | <0.90           |
| 2  | rs562386202 | G    | A    | 0.00 | 0.51 | 0.092 | 3.40E-08  | NA | NA | NA   | NA     | NA    | NA       |                 |

Chr indicates chromosome; SNP, single nucleotide polymorphism; EA, effect allele; NEA, non-effect allele; EAF, effect allele frequency; SE, standard error.

<sup>a</sup> Beta presents natural logarithm of odds ratio.

# Genetic variants which were not available in the outcome summary statistics data were replaced by their proxies ( $R^2 > 0.90$ ). The effect allele and non-effect allele of proxies were noted in the brackets.

\* Palindromic SNPs with minor allele frequency of  $> 0.42$  were considered to be strand-ambiguous and removed from final analysis.

**ESM Table 6. Characteristics of the single-nucleotide polymorphisms associated with coronary artery disease and their associations with major depressive disorder**

| Chr | SNP        | Coronary artery disease |     |      |                   |       |          | Major depressive disorder |     |      |                   |       |          | Ambiguous<br>palindrome* |
|-----|------------|-------------------------|-----|------|-------------------|-------|----------|---------------------------|-----|------|-------------------|-------|----------|--------------------------|
|     |            | EA                      | NEA | EAF  | Beta <sup>a</sup> | SE    | P        | EA                        | NEA | EAF  | Beta <sup>a</sup> | SE    | P        |                          |
| 1   | rs11206510 | T                       | C   | 0.85 | 0.08              | 0.014 | 2.34E-08 | T                         | C   | 0.81 | -0.012            | 0.006 | 2.45E-02 |                          |
| 1   | rs6689306  | A                       | G   | 0.45 | 0.06              | 0.010 | 2.60E-09 | A                         | G   | 0.42 | 0.002             | 0.004 | 6.42E-01 |                          |
| 1   | rs67180937 | G                       | T   | 0.66 | 0.08              | 0.014 | 1.01E-12 | G                         | T   | 0.74 | -0.001            | 0.005 | 8.20E-01 |                          |
| 1   | rs7528419  | A                       | G   | 0.79 | 0.11              | 0.013 | 1.97E-23 | A                         | G   | 0.78 | 0.000             | 0.005 | 9.31E-01 |                          |
| 1   | rs9970807  | C                       | T   | 0.92 | 0.12              | 0.018 | 5.00E-14 | C                         | T   | 0.91 | -0.002            | 0.008 | 7.99E-01 |                          |
| 2   | rs16986953 | A                       | G   | 0.10 | 0.09              | 0.014 | 1.45E-08 | A                         | G   | 0.07 | 0.009             | 0.009 | 2.95E-01 |                          |
| 2   | rs7568458  | A                       | T   | 0.45 | 0.06              | 0.010 | 3.62E-10 | A                         | T   | 0.45 | 0.000             | 0.004 | 9.56E-01 | Yes                      |
| 4   | rs17087335 | T                       | G   | 0.21 | 0.06              | 0.014 | 4.59E-08 | T                         | G   | 0.19 | 0.008             | 0.006 | 1.60E-01 |                          |
| 4   | rs4593108  | C                       | G   | 0.80 | 0.07              | 0.014 | 8.82E-10 | C                         | G   | 0.83 | 0.002             | 0.006 | 7.03E-01 |                          |
| 4   | rs72689147 | G                       | T   | 0.82 | 0.07              | 0.014 | 6.07E-09 | G                         | T   | 0.82 | 0.008             | 0.006 | 1.48E-01 |                          |
| 6   | rs12202017 | A                       | G   | 0.70 | 0.07              | 0.009 | 1.98E-11 | A                         | G   | 0.71 | -0.006            | 0.005 | 2.22E-01 |                          |
| 6   | rs4252185  | C                       | T   | 0.06 | 0.29              | 0.026 | 1.64E-32 | C                         | T   | 0.10 | 0.004             | 0.008 | 5.86E-01 |                          |
| 6   | rs55730499 | T                       | C   | 0.06 | 0.31              | 0.025 | 5.39E-39 | T                         | C   | 0.08 | -0.002            | 0.008 | 7.70E-01 |                          |
| 6   | rs56336142 | T                       | C   | 0.81 | 0.07              | 0.009 | 1.85E-08 | T                         | C   | 0.79 | -0.012            | 0.005 | 1.93E-02 |                          |
| 6   | rs9349379  | G                       | A   | 0.43 | 0.13              | 0.009 | 1.81E-42 | G                         | A   | 0.41 | -0.003            | 0.004 | 5.62E-01 |                          |
| 7   | rs11556924 | C                       | T   | 0.69 | 0.08              | 0.009 | 5.34E-11 | C                         | T   | 0.62 | 0.006             | 0.004 | 1.49E-01 |                          |
| 7   | rs2107595  | A                       | G   | 0.20 | 0.08              | 0.009 | 8.05E-11 | A                         | G   | 0.16 | 0.010             | 0.006 | 1.08E-01 |                          |
| 7   | rs3918226  | T                       | C   | 0.06 | 0.13              | 0.022 | 1.69E-09 | T                         | C   | 0.08 | 0.000             | 0.008 | 9.63E-01 |                          |
| 9   | rs2519093  | T                       | C   | 0.19 | 0.08              | 0.014 | 1.19E-11 | T                         | C   | 0.19 | -0.007            | 0.006 | 2.12E-01 |                          |
| 9   | rs2891168  | G                       | A   | 0.49 | 0.19              | 0.012 | 2.29E-98 | G                         | A   | 0.49 | 0.009             | 0.004 | 4.68E-02 |                          |
| 10  | rs11191416 | T                       | G   | 0.87 | 0.08              | 0.014 | 4.65E-09 | T                         | G   | 0.91 | 0.032             | 0.008 | 3.07E-05 |                          |
| 10  | rs1412444  | T                       | C   | 0.37 | 0.07              | 0.009 | 5.15E-12 | T                         | C   | 0.34 | -0.001            | 0.005 | 7.55E-01 |                          |
| 10  | rs1870634  | G                       | T   | 0.64 | 0.08              | 0.009 | 5.55E-15 | G                         | T   | 0.67 | 0.005             | 0.005 | 2.97E-01 |                          |
| 10  | rs2487928  | A                       | G   | 0.42 | 0.06              | 0.010 | 4.41E-11 | A                         | G   | 0.45 | 0.004             | 0.004 | 3.92E-01 |                          |



|    |                 |   |   |      |      |       |          |    |    |      |        |       |          |     |
|----|-----------------|---|---|------|------|-------|----------|----|----|------|--------|-------|----------|-----|
| 11 | rs10840293      | A | G | 0.55 | 0.06 | 0.010 | 1.28E-08 | A  | G  | 0.56 | 0.003  | 0.004 | 5.29E-01 |     |
| 11 | rs2128739       | A | C | 0.32 | 0.07 | 0.009 | 7.05E-11 | A  | C  | 0.28 | 0.001  | 0.005 | 7.92E-01 |     |
| 12 | rs2681472       | G | A | 0.20 | 0.08 | 0.009 | 6.17E-11 | G  | A  | 0.17 | 0.007  | 0.006 | 2.55E-01 |     |
| 12 | rs3184504       | T | C | 0.42 | 0.07 | 0.009 | 1.03E-09 | T  | C  | 0.48 | -0.003 | 0.004 | 4.69E-01 |     |
| 13 | rs11838776      | A | G | 0.26 | 0.07 | 0.009 | 1.83E-10 | A  | G  | 0.28 | -0.001 | 0.005 | 9.17E-01 |     |
| 14 | rs10139550      | G | C | 0.42 | 0.06 | 0.010 | 1.38E-08 | G  | C  | 0.42 | 0.000  | 0.004 | 9.33E-01 | Yes |
| 15 | rs4468572       | C | T | 0.59 | 0.08 | 0.009 | 4.44E-16 | C  | T  | 0.57 | 0.006  | 0.004 | 2.08E-01 |     |
| 15 | rs56062135      | C | T | 0.79 | 0.07 | 0.014 | 4.52E-09 | C  | T  | 0.76 | 0.005  | 0.005 | 3.56E-01 |     |
| 15 | rs8042271       | G | A | 0.90 | 0.10 | 0.018 | 3.68E-08 | G  | A  | 0.96 | 0.001  | 0.011 | 9.16E-01 |     |
| 17 | rs7212798       | C | T | 0.15 | 0.08 | 0.014 | 1.88E-08 | C  | T  | 0.15 | 0.000  | 0.006 | 9.60E-01 |     |
| 18 | rs663129        | A | G | 0.26 | 0.06 | 0.010 | 3.20E-08 | A  | G  | 0.24 | -0.016 | 0.005 | 1.66E-03 |     |
| 19 | rs4420638       | G | A | 0.17 | 0.10 | 0.014 | 7.07E-11 | G  | A  | 0.19 | -0.001 | 0.006 | 8.72E-01 |     |
| 19 | rs56289821      | G | A | 0.90 | 0.13 | 0.018 | 4.44E-15 | G  | A  | 0.88 | -0.004 | 0.007 | 5.48E-01 |     |
| 21 | rs28451064      | A | G | 0.12 | 0.13 | 0.013 | 1.33E-15 | A  | G  | 0.13 | -0.002 | 0.007 | 8.00E-01 |     |
| 22 | rs180803        | G | T | 0.97 | 0.18 | 0.029 | 1.64E-10 | G  | T  | 0.99 | 0.016  | 0.021 | 4.44E-01 |     |
| 2  | rs192011340     | D | I | 0.75 | 0.07 | 0.014 | 2.89E-08 | NA | NA | NA   | NA     | NA    | NA       |     |
| 2  | chr2:44074126:D | I | D | 0.74 | 0.06 | 0.014 | 2.60E-08 | NA | NA | NA   | NA     | NA    | NA       |     |
| 2  | rs17678683      | G | T | 0.09 | 0.10 | 0.018 | 3.00E-09 | NA | NA | NA   | NA     | NA    | NA       |     |
| 2  | rs201810558     | I | D | 0.11 | 0.14 | 0.013 | 2.15E-18 | NA | NA | NA   | NA     | NA    | NA       |     |
| 3  | rs377727514     | I | D | 0.16 | 0.08 | 0.009 | 2.89E-09 | NA | NA | NA   | NA     | NA    | NA       |     |

Chr indicates chromosome; SNP, single nucleotide polymorphism; EA, effect allele; NEA, non-effect allele; EAF, effect allele frequency; SE, standard error.

a Beta presents natural logarithm of odds ratio.

\* Palindromic SNPs with minor allele frequency of >0.42 were considered to be strand-ambiguous and removed from final analysis.

**ESM Table 7. Characteristics of the single-nucleotide polymorphisms associated with heart failure and their associations with major depressive disorder**

| Chr | SNP         | Heart failure |     |      |                   |        |          | Major depressive disorder |     |      |                   |        |          | Ambiguous<br>palindrome* |
|-----|-------------|---------------|-----|------|-------------------|--------|----------|---------------------------|-----|------|-------------------|--------|----------|--------------------------|
|     |             | EA            | NEA | EAF  | Beta <sup>a</sup> | SE     | P        | EA                        | NEA | EAF  | Beta <sup>a</sup> | SE     | P        |                          |
| 5   | rs11745324  | A             | G   | 0.23 | -0.05             | 0.0095 | 2.35E-08 | A                         | G   | 0.23 | -0.006            | 0.0051 | 2.54E-01 |                          |
| 6   | rs140570886 | T             | C   | 0.98 | -0.21             | 0.0328 | 7.69E-11 | T                         | C   | 0.98 | 0.006             | 0.018  | 7.31E-01 |                          |
| 9   | rs1556516   | C             | G   | 0.48 | 0.06              | 0.0078 | 1.57E-15 | C                         | G   | 0.50 | 0.009             | 0.0043 | 2.90E-02 | Yes                      |
| 4   | rs17042102  | A             | G   | 0.12 | 0.11              | 0.0121 | 5.71E-20 | A                         | G   | 0.11 | 0.001             | 0.007  | 9.23E-01 |                          |
| 10  | rs17617337  | T             | C   | 0.22 | -0.06             | 0.0095 | 3.65E-09 | T                         | C   | 0.22 | 0.015             | 0.0052 | 3.84E-03 |                          |
| 6   | rs4135240   | T             | C   | 0.66 | 0.05              | 0.0084 | 6.84E-09 | T                         | C   | 0.66 | 0.006             | 0.0046 | 2.11E-01 |                          |
| 10  | rs4746140   | C             | G   | 0.15 | -0.07             | 0.0109 | 1.10E-09 | C                         | G   | 0.15 | 0.000             | 0.006  | 9.52E-01 |                          |
| 12  | rs4766578   | A             | T   | 0.53 | -0.04             | 0.0079 | 4.90E-08 | A                         | T   | 0.50 | 0.003             | 0.0043 | 4.88E-01 | Yes                      |
| 6   | rs55730499  | T             | C   | 0.07 | 0.11              | 0.0157 | 1.83E-11 | T                         | C   | 0.08 | -0.002            | 0.0081 | 7.70E-01 |                          |
| 16  | rs56094641  | A             | G   | 0.58 | -0.05             | 0.008  | 1.21E-08 | A                         | G   | 0.59 | -0.010            | 0.0044 | 1.69E-02 |                          |
| 9   | rs600038    | T             | C   | 0.79 | -0.06             | 0.0096 | 3.68E-09 | T                         | C   | 0.79 | 0.003             | 0.0053 | 6.04E-01 |                          |
| 1   | rs660240    | T             | C   | 0.21 | -0.06             | 0.0097 | 3.25E-10 | T                         | C   | 0.21 | -0.002            | 0.0052 | 7.68E-01 |                          |

Chr indicates chromosome; SNP, single nucleotide polymorphism; EA, effect allele; NEA, non-effect allele; EAF, effect allele frequency; SE, standard error.

<sup>a</sup> Beta presents natural logarithm of odds ratio.

\* Palindromic SNPs with minor allele frequency of >0.42 were considered to be strand-ambiguous and removed from final analysis.

**ESM Table 8. Power calculation for the association estimates in Mendelian Randomization analyses**

| Exposure                  | Estimated r-square for exposure* | Outcome                   | Participants in outcome GWAS data (proportion of cases, % ) | Power to detect OR of following magnitude |      |      |      |
|---------------------------|----------------------------------|---------------------------|-------------------------------------------------------------|-------------------------------------------|------|------|------|
|                           |                                  |                           |                                                             | 1.10                                      | 1.20 | 1.30 | 1.40 |
| Major depressive disorder | 0.003                            | Type 2 diabetes           | 898130 (8.25)                                               | 0.29                                      | 0.80 | 0.99 | 1.00 |
|                           |                                  | Coronary artery disease   | 184305 (32.99)                                              | 0.19                                      | 0.55 | 0.86 | 0.98 |
|                           |                                  | Heart failure             | 977323 (4.84)                                               | 0.21                                      | 0.63 | 0.93 | 1.00 |
| Type 2 diabetes           | 0.01                             |                           |                                                             | 0.90                                      | 1.00 | 1.00 | 1.00 |
| Coronary artery disease   | 0.017                            | Major depressive disorder | 500199 (34.14)                                              | 0.99                                      | 1.00 | 1.00 | 1.00 |
| Heart failure             | 0.0024                           |                           |                                                             | 0.36                                      | 0.87 | 0.99 | 1.00 |

GWAS indicates genome-wide association study; OR, odds ratio.

\* The variance of the exposure trait explained by genetic variants (r-square) was computed using get-or-from-lor commend in TwoSampleMR package [<https://github.com/MRCIEU/TwoSampleMR>] in R 3.6.0, based on the parameters of effect size estimates (log(OR)), effect allele frequency, sample size of cases and controls, and prevalence of exposure trait. As prevalence contributed little to the calculation, we assumed all the prevalence of traits to be 10%.

**ESM Fig. 1. Scatter plot and leave-one-out analysis for the association of major depressive disorder with type 2 diabetes**

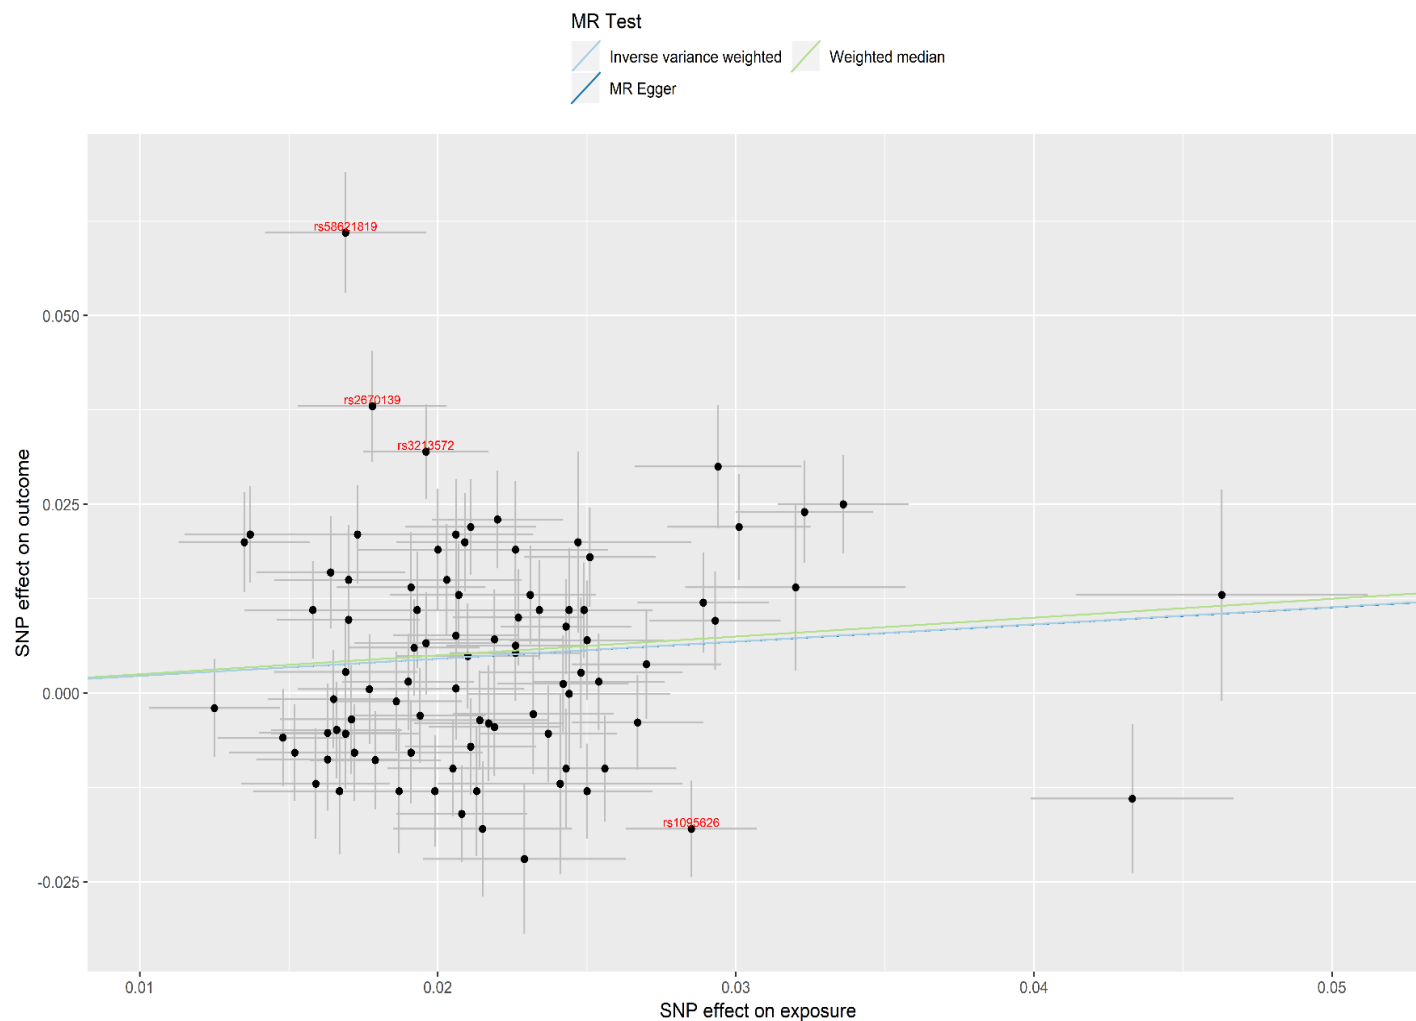

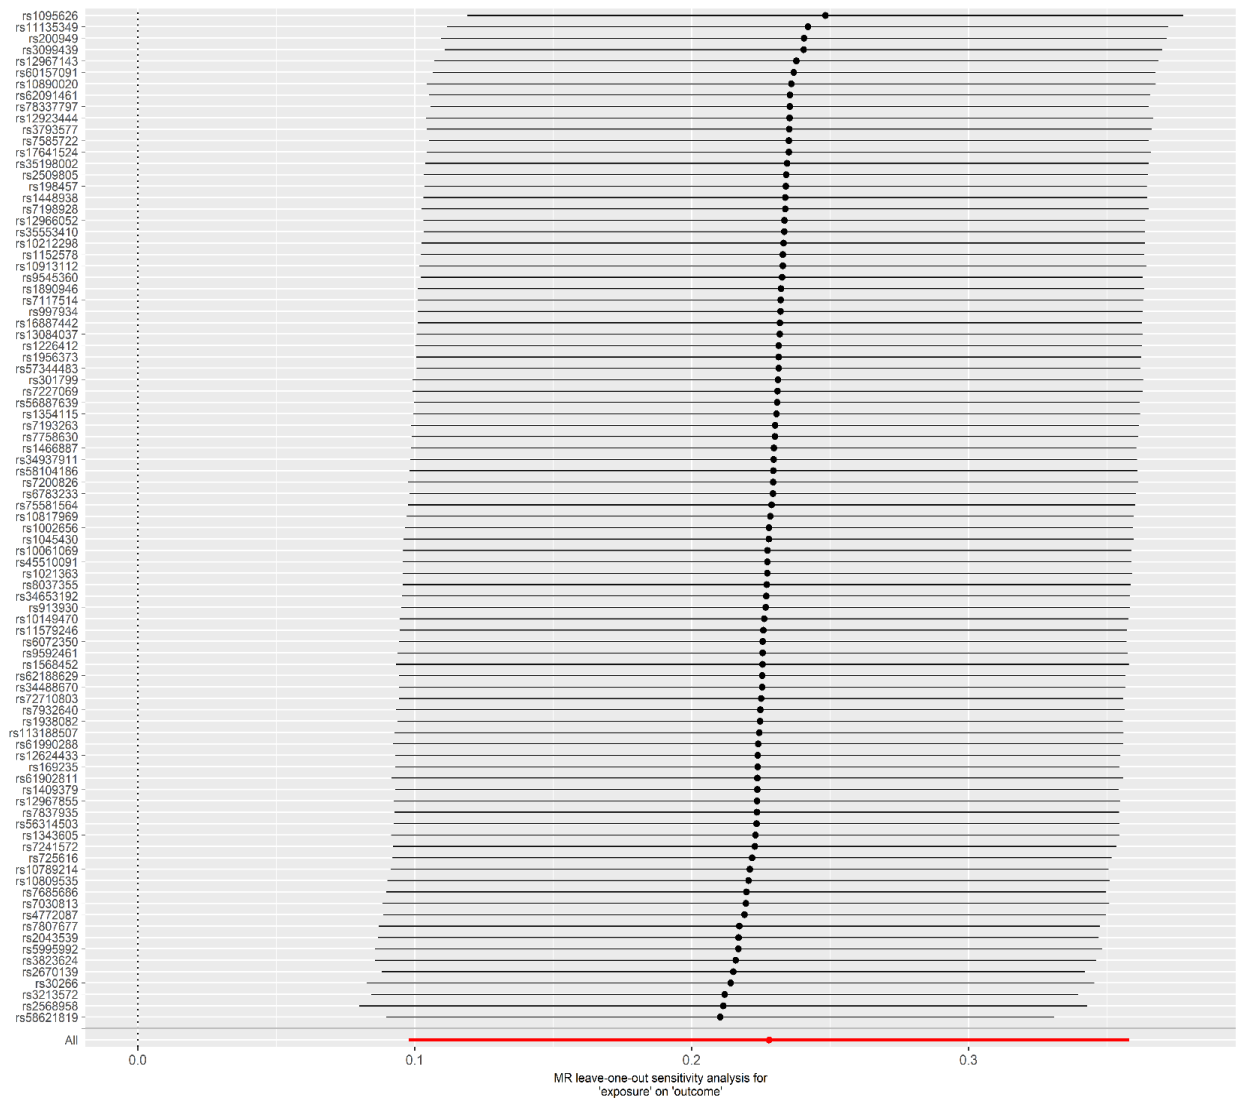

SNP indicates single nucleotide polymorphism; MR, mendelian randomization.

In the scatter plot, the red marked SNPs were those identified as possible outliers in the MR-PRESSO analysis.

**ESM Fig. 2. The association of major depressive disorder with type 2 diabetes using type 2 diabetes summary statistics data with adjustment for BMI**

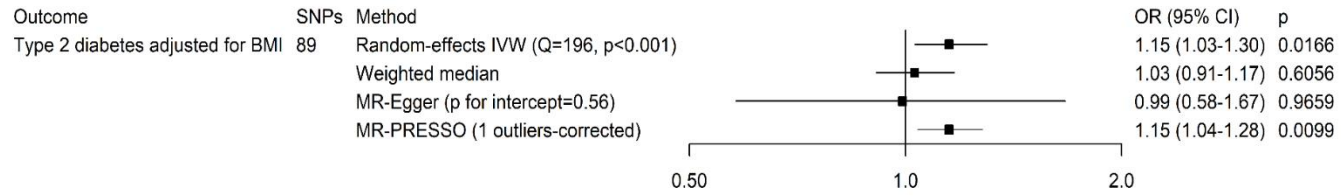

CI indicates confidence interval; IVW, inverse-variance weighted; OR, odds ratio; BMI, body mass index; MR-PRESSO, Mendelian randomization pleiotropy residual sum and outlier.

**ESM Fig. 3. Scatter plot and leave-one-out analysis for the association of major depressive disorder with coronary artery disease**

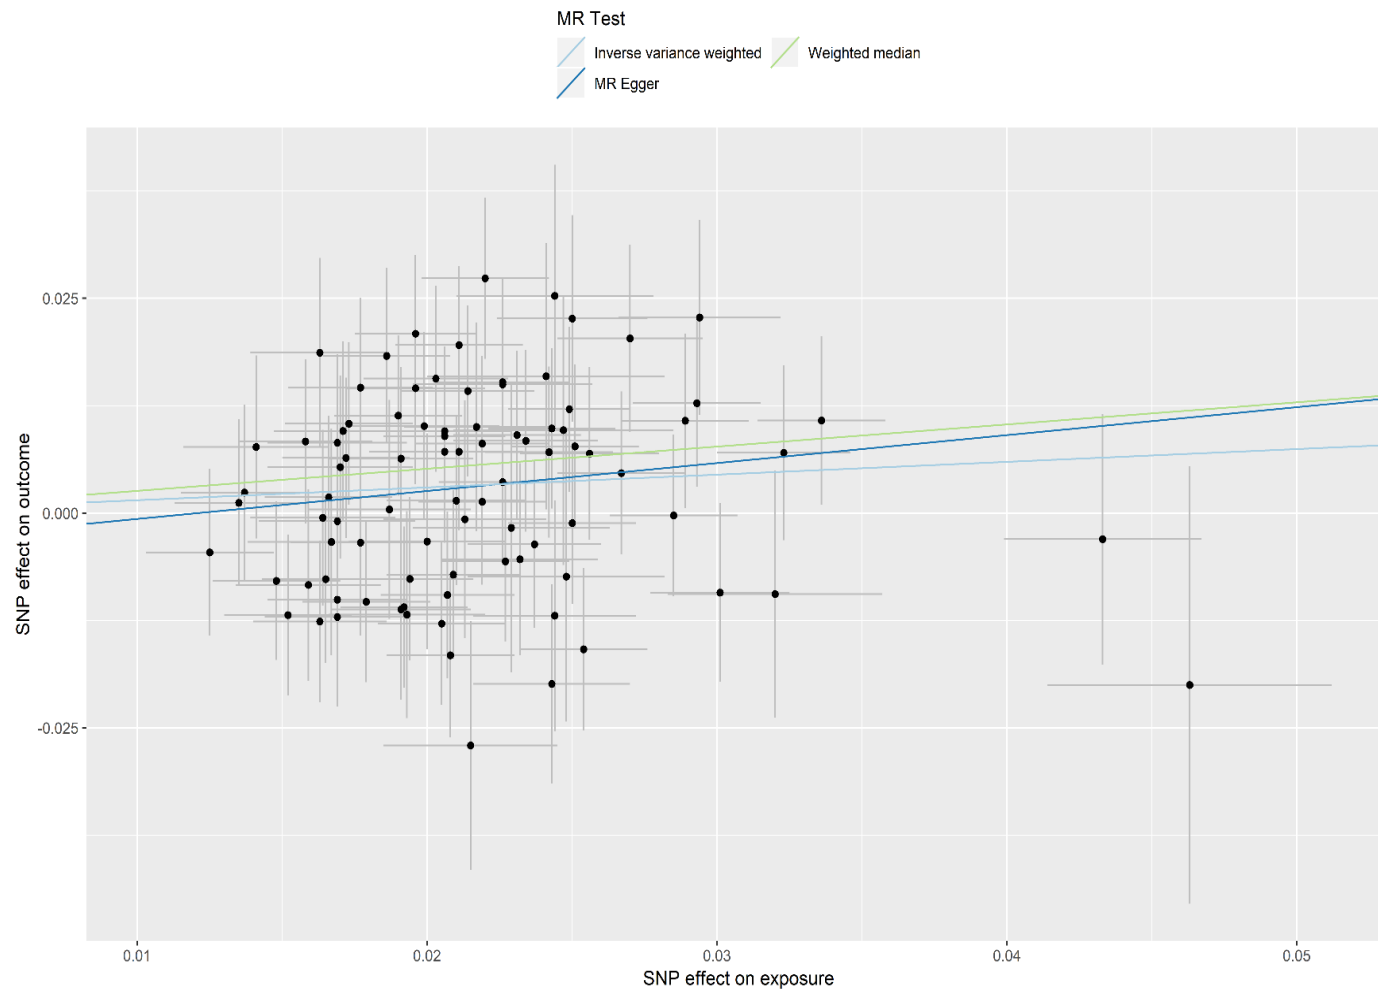

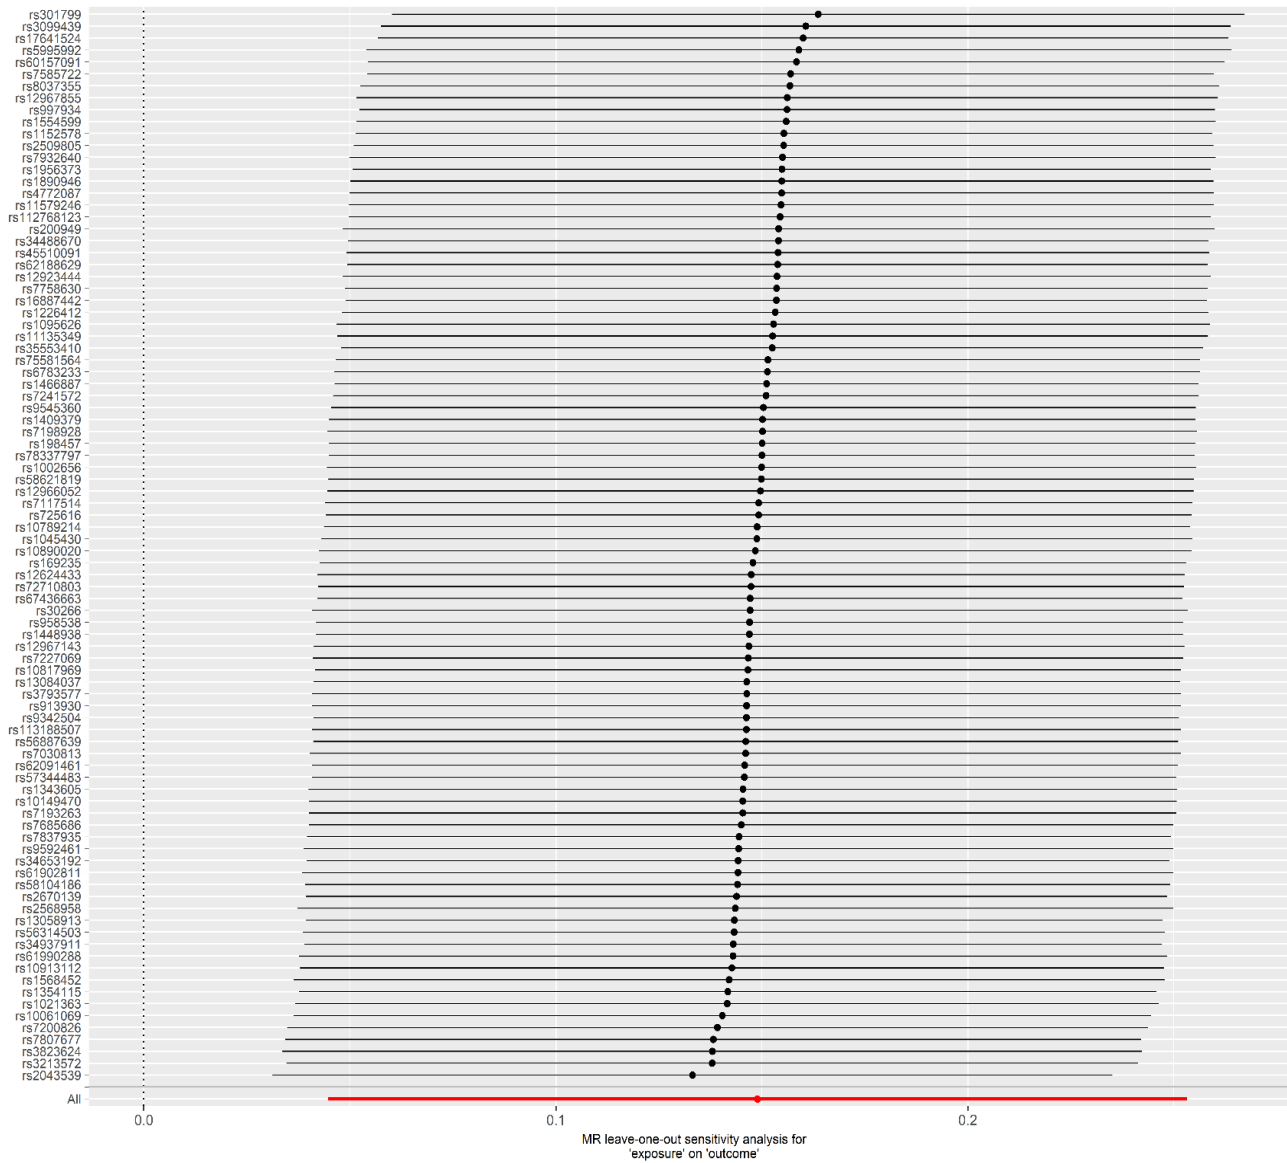

SNP indicates single nucleotide polymorphism; MR, mendelian randomization.



**ESM Fig. 4. Scatter plot and leave-one-out analysis for the association of major depressive disorder with heart failure**

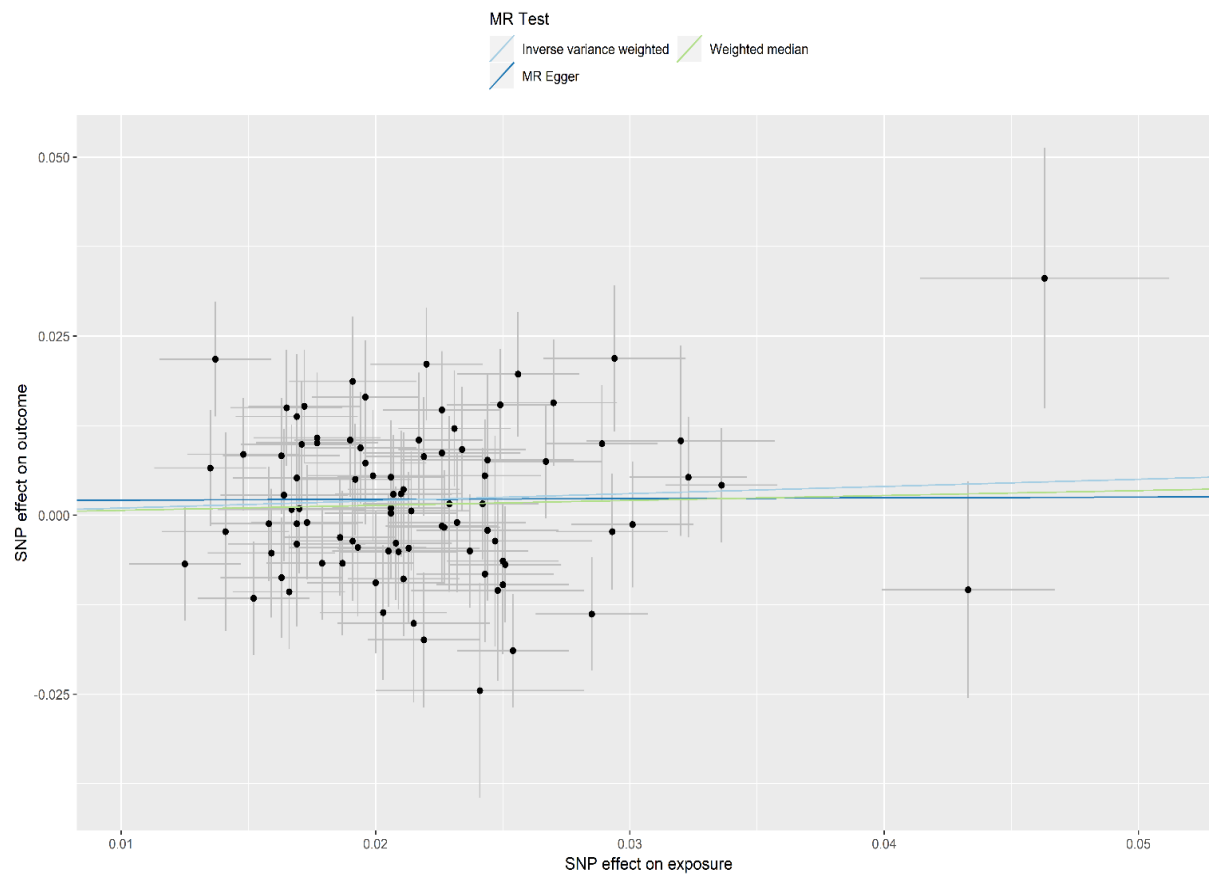

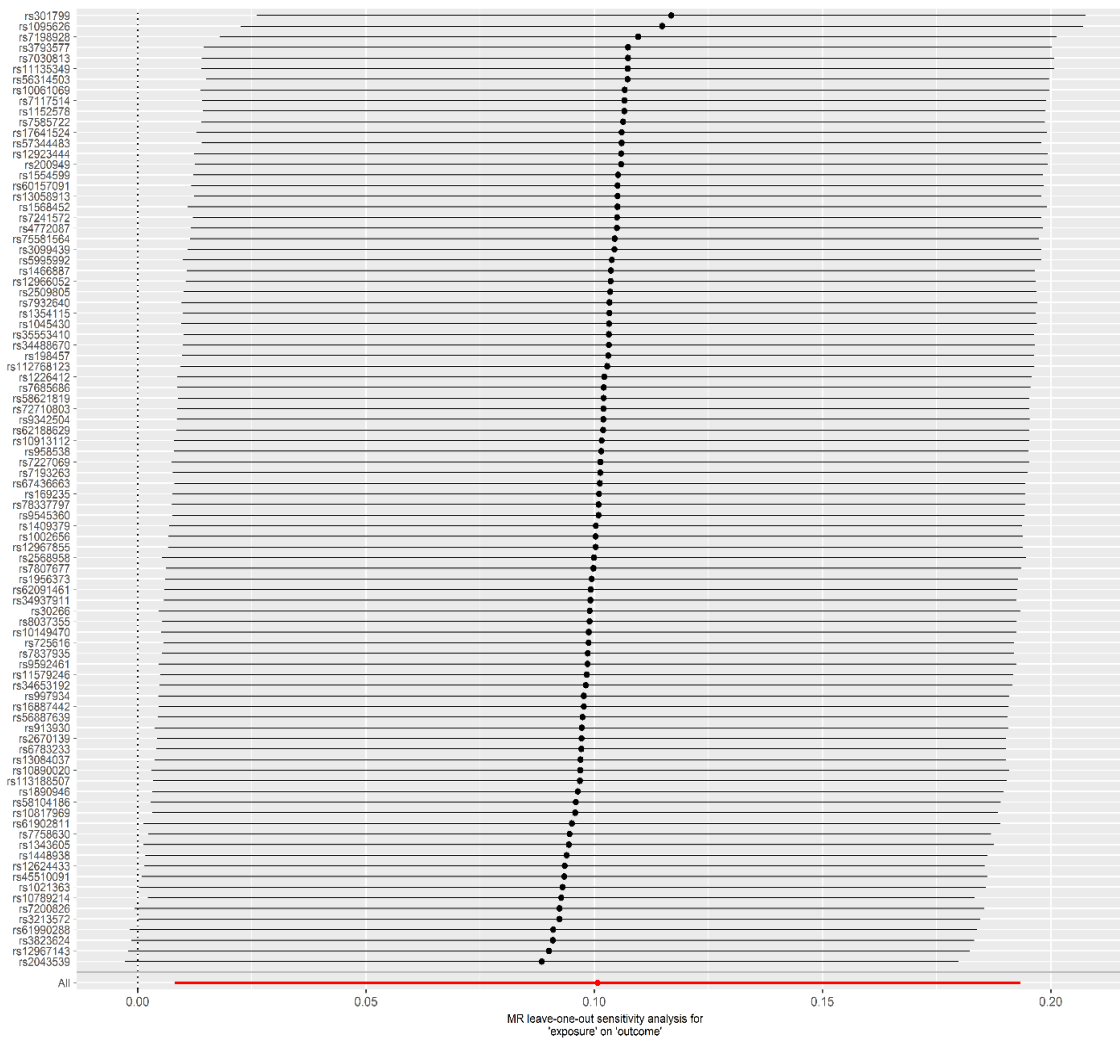

SNP indicates single nucleotide polymorphism; MR, mendelian randomization.

**ESM Fig. 5: The association of type 2 diabetes with major depressive disorder using SNPs for type 2 diabetes with and without adjustment for BMI**

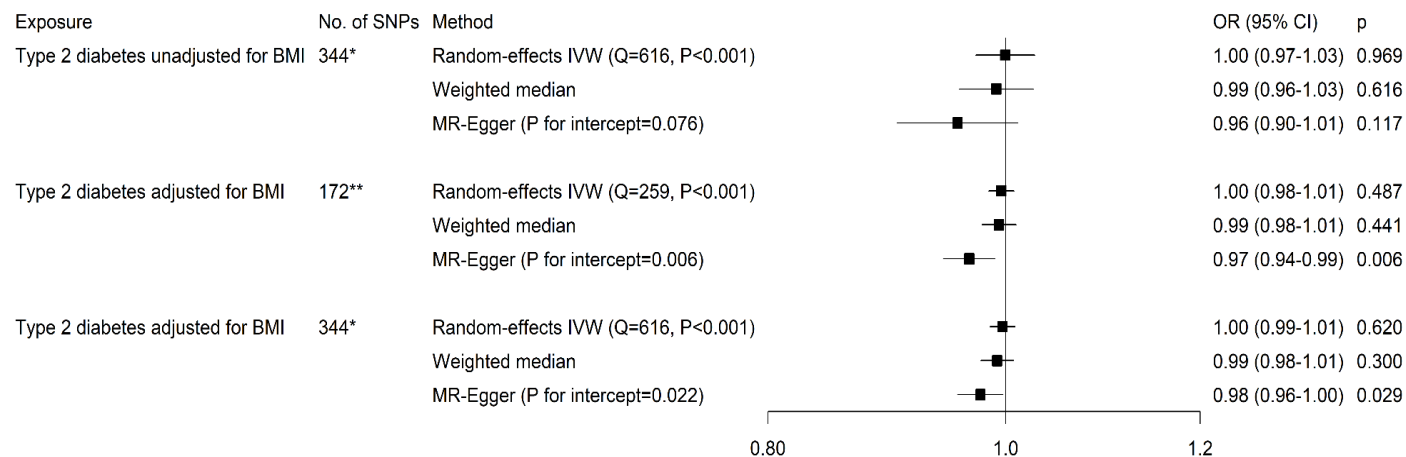

CI indicates confidence interval; IVW, inverse-variance weighted; OR, odds ratio; BMI, body mass index.

\* All 403 distinct association SNPs were included in analysis.

\*\* 172 SNPs out of 403 SNPs meeting a genome-wide significant level ( $p < 5 \times 10^{-8}$ ) were included in analysis.
